# Supplementary material for: Semen microbiota in normal and leukocytospermic males
Source: PubMed Central journal article supplement — Asian J Androl. 2021 Dec 10;24(4):398–405. doi: 10.4103/aja202172 (PMC9295480; doi:10.4103/aja202172), 2021-12-10
Supplement: AJA-24-398_Suppl1.pdf [file AJA-24-398_Suppl1.pdf]

| No. | Group  | data     | Age(y<br>ear) | Volume<br>(ml) | Sperm<br>concentr<br>ation(10 <sup>6</sup> /<br>ml) | Progressive<br>motility(%) | Total<br>motility(%) | Acrosin<br>activity(μIU/<br>106) | Leukocytosp<br>ermia(10 <sup>6</sup> /<br>ml) |
|-----|--------|----------|---------------|----------------|-----------------------------------------------------|----------------------------|----------------------|----------------------------------|-----------------------------------------------|
| 1   | Normal | 20201123 | 33            | 5.0            | 117.9                                               | 38.3                       | 54.1                 | 85.4                             | 0.7                                           |
| 5   | Normal | 20201119 | 36            | 2.5            | 387.9                                               | 43.8                       | 74.6                 | 117.4                            | 0.5                                           |
| 6   | Normal | 20201118 | 36            | 1.0            | 175.3                                               | 34.9                       | 68.2                 | 104.8                            | 0.7                                           |
| 7   | Normal | 20201118 | 34            | 2.0            | 135.5                                               | 39.3                       | 70.7                 | 119.3                            | 0.6                                           |
| 10  | Normal | 20201117 | 30            | 2.0            | 228.5                                               | 42.9                       | 67.4                 | 100.5                            | 0.9                                           |
| 11  | Normal | 20201116 | 36            | 1.0            | 337.4                                               | 47.2                       | 80.3                 | 119.4                            | 0.7                                           |
| 12  | Normal | 20201116 | 33            | 2.5            | 225.8                                               | 44.7                       | 77.2                 | 125.0                            | 0.5                                           |
| 14  | Normal | 20201112 | 30            | 2.5            | 435.7                                               | 59.1                       | 82.9                 | 122.7                            | 0.5                                           |
| 16  | Normal | 20201111 | 30            | 3.5            | 292.2                                               | 41.8                       | 68.6                 | 105.6                            | 0.8                                           |
| 18  | Normal | 20201110 | 36            | 1.0            | 196.6                                               | 41.6                       | 65.2                 | 99.2                             | 0.9                                           |
| 20  | Normal | 20201110 | 39            | 4.5            | 199.2                                               | 47.1                       | 66.2                 | 88.5                             | 0.9                                           |
| 31  | Normal | 20201104 | 33            | 3.0            | 286.9                                               | 34.3                       | 53.7                 | 87.2                             | 1.0                                           |
| 46  | Normal | 20201028 | 34            | 4.0            | 236.4                                               | 43.9                       | 66.0                 | 97.1                             | 0.8                                           |
| 50  | Normal | 20201027 | 32            | 2.5            | 263.0                                               | 35.6                       | 65.6                 | 88.5                             | 0.7                                           |
| 51  | Normal | 20201027 | 28            | 0.3            | 157.4                                               | 32.9                       | 60.3                 | 82.6                             | 0.8                                           |
| 58  | Normal | 20201026 | 29            | 2.0            | 260.3                                               | 55.1                       | 74.5                 | /                                | 0.6                                           |
| 64  | Normal | 20201019 | 31            | 1.0            | 221.4                                               | 36.0                       | 60.0                 | 93.7                             | 1.0                                           |
| 69  | Normal | 20201019 | 27            | 2.0            | 207.2                                               | 55.1                       | 78.2                 | 119.2                            | 0.6                                           |
| 74  | Normal | 20201015 | 36            | 1.0            | 305.5                                               | 58.3                       | 78.3                 | 118.1                            | 0.5                                           |
| 75  | Normal | 20201014 | 27            | 1.5            | 345.3                                               | 40.0                       | 77.7                 | 114.7                            | 0.8                                           |
| 76  | Normal | 20201014 | 29            | 6.0            | 140.8                                               | 40.4                       | 68.3                 | 101.3                            | 0.6                                           |
| 79  | Normal | 20201013 | 34            | 1.0            | 268.3                                               | 38.6                       | 74.2                 | 107.4                            | 0.8                                           |
| 82  | Normal | 20201012 | 30            | 2.5            | 196.6                                               | 39.2                       | 52.7                 | 90.7                             | 1.0                                           |
| 85  | Normal | 20201009 | 30            | 2.5            | 164.7                                               | 40.3                       | 69.7                 | 89.0                             | 0.4                                           |
| 89  | Normal | 20200930 | 36            | 0.5            | 156.7                                               | 35.6                       | 60.7                 | 51.9                             | 0.4                                           |
| 91  | Normal | 20200929 | 36            | 1.0            | 223.1                                               | 44.9                       | 73.9                 | 111.7                            | 0.9                                           |
| 99  | Normal | 20200924 | 26            | 7.0            | 217.8                                               | 36.6                       | 65.5                 | 107.3                            | 0.8                                           |
| 102 | Normal | 20200923 | 29            | 4.5            | 494.1                                               | 50.0                       | 81.5                 | 111.4                            | 0.7                                           |
| 109 | Normal | 20200917 | 28            | 1.0            | 496.8                                               | 50.3                       | 77.6                 | 113.5                            | 0.8                                           |
| 110 | Normal | 20200917 | 31            | 1.0            | 167.4                                               | 41.3                       | 60.3                 | 105.0                            | 0.6                                           |
| 121 | Normal | 20200910 | 26            | 1.5            | 286.9                                               | 57.9                       | 81.5                 | 119.2                            | 0.7                                           |
| 124 | Normal | 20200909 | 31            | 4.0            | 183.3                                               | 52.1                       | 78.2                 | 99.4                             | 0.8                                           |
| 127 | Normal | 20200908 | 36            | 0.3            | 103.6                                               | 43.6                       | 61.5                 | 102.7                            | 0.9                                           |
| 133 | Normal | 20200907 | 32            | 1.5            | 308.2                                               | 38.8                       | 78.5                 | 119.6                            | 1.0                                           |
| 134 | Normal | 20200907 | 29            | 4.5            | 130.2                                               | 49.3                       | 70.0                 | 115.4                            | 0.5                                           |
| 144 | Normal | 20200902 | 23            | 5.0            | 164.7                                               | 35.1                       | 54.1                 | 93.4                             | 0.6                                           |
| 146 | Normal | 20200901 | 32            | 5.0            | 111.6                                               | 41.4                       | 53.3                 | 94.0                             | 0.7                                           |
| 148 | Normal | 20200901 | 28            | 3.0            | 151.4                                               | 57.9                       | 71.9                 | 111.5                            | 0.8                                           |
| 149 | Normal | 20200901 | 32            | 5.0            | 111.6                                               | 41.4                       | 53.3                 | 94.0                             | 0.7                                           |

|     |        |          |    |     |       |      |      |       |     |
|-----|--------|----------|----|-----|-------|------|------|-------|-----|
| 156 | Normal | 20200827 | 28 | 5.0 | 239.1 | 45.5 | 77.7 | 122.8 | 0.5 |
| 162 | Normal | 20200825 | 29 | 1.0 | 90.3  | 41.1 | 55.8 | 95.3  | 0.7 |
| 163 | Normal | 20200825 | 35 | 1.0 | 382.5 | 39.6 | 64.9 | 102.0 | 0.8 |
| 170 | Normal | 20200821 | 30 | 3.0 | 199.2 | 56.0 | 68.4 | 115.3 | 0.8 |
| 171 | Normal | 20200819 | 24 | 1.5 | 130.2 | 33.6 | 58.1 | 99.2  | 0.6 |
| 172 | Normal | 20200819 | 26 | 5.0 | 316.1 | 36.1 | 63.0 | 105.6 | 0.9 |
| 178 | Normal | 20200818 | 31 | 2.5 | 201.9 | 48.7 | 68.4 | 117.3 | 0.6 |
| 185 | Normal | 20200814 | 38 | 1.0 | 263.0 | 39.4 | 68.7 | 113.4 | 0.8 |
| 189 | Normal | 20200813 | 32 | 5.0 | 78.2  | 54.4 | 68.0 | 100.8 | 0.5 |
| 192 | Normal | 20200812 | 32 | 1.0 | 247.1 | 61.3 | 83.9 | 122.4 | 0.4 |
| 195 | Normal | 20200811 | 32 | 3.5 | 148.8 | 43.4 | 79.2 | 116.3 | 1.0 |
| 212 | Normal | 20200804 | 33 | 4.0 | 273.6 | 40.8 | 81.6 | 119.5 | 0.6 |
| 214 | Normal | 20200803 | 34 | 2.5 | 74.4  | 42.9 | 60.3 | 95.2  | 0.7 |
| 220 | Normal | 20200731 | 30 | 1.0 | 204.6 | 42.9 | 66.3 | 117.7 | 0.4 |
| 221 | Normal | 20200731 | 25 | 1.0 | 252.4 | 67.4 | 83.2 | 125.0 | 0.7 |
| 223 | Normal | 20200731 | 32 | 4.0 | 120.1 | 44.3 | 75.3 | 89.4  | 1.0 |
| 225 | Normal | 20200731 | 28 | 2.0 | 193.9 | 45.2 | 74.7 | 105.1 | 0.8 |
| 231 | Normal | 20200729 | 28 | 3.5 | 225.8 | 48.2 | 76.0 | 114.6 | 0.8 |
| 232 | Normal | 20200728 | 42 | 0.5 | 220.5 | 37.4 | 72.9 | 91.2  | 0.9 |
| 242 | Normal | 20200723 | 25 | 0.5 | 342.7 | 60.4 | 78.2 | 93.9  | 1.0 |
| 245 | Normal | 20200723 | 33 | 4.5 | 358.6 | 54.8 | 80.0 | 120.1 | 0.8 |
| 250 | Normal | 20200721 | 38 | 2.5 | 438.3 | 43.7 | 71.6 | 114.8 | 0.5 |
| 269 | Normal | 20200709 | 31 | 1.5 | 130.2 | 34.6 | 55.0 | 99.1  | 0.7 |
| 278 | Normal | 20200703 | 28 | 4.0 | 119.5 | 38.6 | 53.3 | 89.1  | 0.8 |
| 283 | Normal | 20200702 | 30 | 1.5 | 316.1 | 47.9 | 70.2 | 93.5  | 0.9 |
| 284 | Normal | 20200702 | 23 | 2.5 | 186.0 | 47.2 | 68.6 | /     | 0.6 |
| 287 | Normal | 20200630 | 27 | 5.0 | 156.7 | 37.3 | 66.1 | 111.4 | 0.8 |
| 294 | Normal | 20200624 | 34 | 3.5 | 114.2 | 32.6 | 49.3 | 94.7  | 0.9 |
| 299 | Normal | 20200623 | 28 | 2.0 | 321.4 | 35.5 | 68.6 | 107.7 | 1.0 |
| 301 | Normal | 20200622 | 28 | 3.0 | 172.7 | 40.0 | 64.6 | 108.8 | 0.6 |
| 307 | Normal | 20200617 | 32 | 4.5 | 239.1 | 52.6 | 86.7 | 118.0 | 0.5 |
| 309 | Normal | 20200616 | 35 | 2.5 | 132.8 | 40.0 | 55.0 | 93.3  | 0.8 |
| 313 | Normal | 20200615 | 37 | 5.0 | 225.8 | 68.2 | 83.5 | 121.8 | 0.3 |
| 323 | Normal | 20200608 | 21 | 5.5 | 249.7 | 44.7 | 75.6 | 119.4 | 0.5 |
| 333 | Normal | 20200601 | 31 | 5.5 | 84.6  | 50.3 | 66.0 | 117.7 | 0.8 |
| 335 | Normal | 20200528 | 28 | 3.0 | 95.8  | 36.1 | 59.1 | 96.2  | 0.7 |
| 339 | Normal | 20200525 | 35 | 5.0 | 107.3 | 69.4 | 81.8 | 121.7 | 0.4 |
| 343 | Normal | 20200521 | 33 | 5.5 | 58.4  | 36.4 | 54.6 | 81.3  | 0.6 |
| 346 | Normal | 20200520 | 24 | 6.0 | 71.7  | 40.8 | 59.3 | 111.8 | 0.7 |
| 347 | Normal | 20200520 | 30 | 1.5 | 165.4 | 37.0 | 71.5 | 109.4 | 0.8 |
| 348 | Normal | 20200518 | 30 | 2.0 | 313.5 | 38.1 | 76.7 | 116.9 | 1.0 |
| 354 | Normal | 20200513 | 31 | 2.5 | 167.4 | 44.4 | 63.4 | 90.5  | 1.0 |
| 361 | Normal | 20200507 | 27 | 5.0 | 114.2 | 36.7 | 68.8 | 93.8  | 0.7 |
| 363 | Normal | 20200507 | 30 | 3.5 | 156.7 | 50.8 | 75.4 | /     | 0.7 |
| 375 | Normal | 20200108 | 29 | 3.5 | 255.0 | 38.5 | 70.8 | 90.9  | 1.0 |

|     |        |          |    |     |       |      |      |       |     |
|-----|--------|----------|----|-----|-------|------|------|-------|-----|
| 376 | Normal | 20200108 | 37 | 6.5 | 175.3 | 39.4 | 63.6 | 105.9 | 1.0 |
| 388 | Normal | 20200106 | 28 | 4.0 | 130.2 | 34.7 | 59.2 | 94.8  | 0.8 |
| 391 | Normal | 20200104 | 30 | 2.0 | 164.7 | 40.3 | 67.7 | 109.9 | 0.5 |
| 393 | Normal | 20200102 | 33 | 4.5 | 268.3 | 37.6 | 68.3 | 93.6  | 0.9 |
| 400 | Normal | 20191230 | 23 | 3.0 | 170.0 | 48.4 | 73.4 | 107.6 | 0.6 |
| 402 | Normal | 20191228 | 30 | 2.0 | 175.3 | 47.0 | 71.2 | 114.5 | 0.7 |
| 419 | Normal | 20191223 | 27 | 2.0 | 122.2 | 34.7 | 66.0 | 119.0 | 0.7 |
| 423 | Normal | 20191221 | 29 | 0.5 | 247.1 | 45.2 | 65.6 | 105.2 | 0.9 |
| 424 | Normal | 20191221 | 35 | 1.5 | 170.0 | 33.6 | 56.3 | 111.4 | 0.6 |
| 430 | Normal | 20191218 | 42 | 2.0 | 257.7 | 39.2 | 72.2 | 121.2 | 0.9 |
| 440 | Normal | 20191213 | 22 | 5.0 | 124.9 | 49.0 | 63.9 | 111.7 | 0.8 |
| 447 | Normal | 20191209 | 32 | 1.5 | 239.1 | 44.4 | 71.1 | 111.9 | 0.7 |
| 452 | Normal | 20191209 | 28 | 3.5 | 119.5 | 42.3 | 68.5 | 105.3 | 1.0 |
| 455 | Normal | 20191205 | 30 | 5.0 | 180.6 | 35.3 | 73.5 | 102.7 | 0.5 |
| 460 | Normal | 20191204 | 30 | 1.0 | 155.4 | 37.6 | 63.2 | 111.6 | 0.7 |
| 462 | Normal | 20191202 | 33 | 2.5 | 90.3  | 36.7 | 52.9 | 93.6  | 0.8 |
| 469 | Normal | 20191127 | 22 | 1.0 | 143.5 | 39.2 | 70.3 | 119.0 | 0.9 |
| 470 | Normal | 20191127 | 26 | 3.5 | 178.9 | 34.6 | 67.3 | 115.2 | 0.7 |
| 473 | Normal | 20191126 | 30 | 3.5 | 170.7 | 33.1 | 62.3 | 93.6  | 1.0 |
| 480 | Normal | 20191122 | 27 | 4.0 | 114.2 | 32.6 | 48.9 | 73.1  | 1.0 |
| 481 | Normal | 20191122 | 33 | 2.0 | 286.9 | 36.7 | 72.2 | 111.5 | 0.9 |
| 484 | Normal | 20191121 | 25 | 1.5 | 406.4 | 32.3 | 77.7 | 100.9 | 0.5 |
| 491 | Normal | 20191118 | 35 | 2.0 | 261.2 | 51.8 | 77.2 | 117.0 | 0.6 |
| 494 | Normal | 20191118 | 23 | 1.5 | 123.1 | 41.1 | 64.8 | 99.8  | 1.0 |
| 514 | Normal | 20191029 | 39 | 5.0 | 154.1 | 58.7 | 75.4 | 111.7 | 0.5 |
| 518 | Normal | 20191030 | 26 | 3.0 | 148.1 | 37.6 | 67.1 | 111.7 | 0.5 |
| 527 | Normal | 20191101 | 28 | 3.0 | 135.5 | 54.9 | 82.4 | 120.0 | 0.7 |
| 528 | Normal | 20191101 | 27 | 1.0 | 138.1 | 46.1 | 67.3 | 119.5 | 0.4 |
| 541 | Normal | 20191105 | 29 | 3.0 | 156.7 | 57.6 | 76.2 | 125.5 | 0.5 |
| 544 | Normal | 20191105 | 27 | 2.5 | 305.5 | 69.1 | 84.3 | 133.0 | 0.6 |
| 547 | Normal | 20191106 | 26 | 6.5 | 132.8 | 42.0 | 64.0 | 93.8  | 0.7 |
| 551 | Normal | 20191107 | 27 | 3.0 | 183.3 | 37.5 | 56.8 | 104.7 | 0.5 |
| 558 | Normal | 20191109 | 29 | 2.0 | 236.4 | 37.4 | 68.1 | 113.8 | 0.6 |
| 565 | Normal | 20191016 | 29 | 2.0 | 183.3 | 58.0 | 82.6 | 125.9 | 0.8 |
| 574 | Normal | 20191018 | 35 | 2.0 | 162.0 | 50.8 | 72.1 | 114.6 | 0.9 |
| 580 | Normal | 20191019 | 36 | 4.0 | 353.3 | 44.4 | 73.0 | 109.8 | 0.6 |
| 588 | Normal | 20191021 | 29 | 3.0 | 178.0 | 49.3 | 73.2 | 111.8 | 1.0 |
| 594 | Normal | 20191022 | 33 | 4.5 | 193.9 | 48.0 | 67.2 | 119.0 | 0.7 |
| 599 | Normal | 20191024 | 30 | 6.0 | 122.2 | 34.3 | 54.3 | 69.1  | 0.8 |
| 607 | Normal | 20191028 | 33 | 3.0 | 131.1 | 46.7 | 68.3 | 119.5 | 0.7 |
| 609 | Normal | 20191028 | 39 | 4.0 | 132.8 | 34.0 | 47.3 | 66.0  | 0.9 |
| 614 | Normal | 20190926 | 37 | 5.0 | 178.0 | 34.3 | 65.6 | 108.9 | 0.5 |
| 623 | Normal | 20190930 | 42 | 3.0 | 140.8 | 32.1 | 52.9 | 117.0 | 0.9 |
| 633 | Normal | 20191009 | 38 | 3.5 | 172.7 | 58.4 | 73.8 | 116.8 | 0.6 |
| 634 | Normal | 20191009 | 29 | 2.0 | 68.4  | 38.8 | 58.2 | 97.7  | 0.4 |

|     |        |          |    |     |       |      |      |       |     |
|-----|--------|----------|----|-----|-------|------|------|-------|-----|
| 645 | Normal | 20191014 | 25 | 2.5 | 212.5 | 41.3 | 61.3 | /     | 0.5 |
| 650 | Normal | 20191014 | 37 | 0.4 | 142.1 | 35.9 | 51.8 | 99.2  | 1.0 |
| 653 | Normal | 20191015 | 30 | 1.5 | 217.8 | 41.5 | 64.7 | 100.3 | 0.4 |
| 654 | Normal | 20191015 | 28 | 1.0 | 212.5 | 36.3 | 54.2 | 66.9  | 1.0 |
| 657 | Normal | 20191015 | 39 | 4.5 | 78.7  | 32.9 | 50.6 | 69.7  | 0.5 |
| 672 | Normal | 20190917 | 28 | 4.0 | 156.7 | 42.4 | 64.4 | 102.7 | 0.9 |
| 678 | Normal | 20190918 | 28 | 2.5 | 409.1 | 50.7 | 78.6 | 116.8 | 0.6 |
| 694 | Normal | 20190923 | 26 | 0.5 | 425.0 | 66.3 | 85.1 | 130.9 | 0.5 |
| 698 | Normal | 20190923 | 31 | 1.5 | 162.0 | 49.2 | 67.2 | 99.1  | 0.9 |
| 699 | Normal | 20190924 | 42 | 3.5 | 252.4 | 42.1 | 75.8 | 115.8 | 0.6 |
| 700 | Normal | 20190924 | 31 | 1.5 | 98.3  | 54.0 | 70.2 | 91.9  | 0.8 |
| 701 | Normal | 20190924 | 34 | 1.5 | 106.3 | 33.0 | 53.0 | 83.1  | 1.0 |
| 704 | Normal | 20190925 | 27 | 2.5 | 350.7 | 42.4 | 70.4 | 100.7 | 1.0 |
| 706 | Normal | 20190925 | 26 | 6.0 | 263.9 | 53.3 | 77.5 | 122.5 | 0.6 |
| 707 | Normal | 20190925 | 27 | 2.0 | 255.0 | 49.0 | 74.0 | 110.1 | 0.5 |
| 710 | Normal | 20190902 | 25 | 0.5 | 146.1 | 38.2 | 65.5 | 98.1  | 1.0 |
| 711 | Normal | 20190902 | 29 | 1.0 | 268.3 | 50.5 | 79.2 | 120.5 | 0.8 |
| 712 | Normal | 20190902 | 30 | 1.5 | 231.1 | 52.8 | 72.0 | 111.9 | 0.6 |
| 718 | Normal | 20190903 | 27 | 6.0 | 191.3 | 46.7 | 62.4 | 110.5 | 0.6 |
| 726 | Normal | 20190907 | 33 | 4.0 | 103.6 | 43.6 | 53.9 | 111.4 | 0.8 |
| 727 | Normal | 20190907 | 36 | 5.0 | 310.8 | 43.2 | 76.1 | 130.0 | 0.8 |
| 728 | Normal | 20190909 | 36 | 1.5 | 186.0 | 47.2 | 67.2 | 119.7 | 0.5 |
| 730 | Normal | 20190815 | 27 | 2.5 | 212.5 | 34.6 | 64.9 | 118.2 | 0.6 |
| 732 | Normal | 20190817 | 30 | 2.5 | 161.4 | 39.5 | 65.4 | 101.6 | 0.8 |
| 735 | Normal | 20190817 | 29 | 2.0 | 151.4 | 35.9 | 49.1 | 85.3  | 1.0 |
| 737 | Normal | 20190819 | 33 | 6.0 | 95.6  | 52.8 | 67.1 | 117.0 | 0.4 |
| 742 | Normal | 20190820 | 26 | 4.0 | 124.9 | 33.2 | 48.1 | 89.2  | 0.8 |
| 745 | Normal | 20190821 | 26 | 4.0 | 186.8 | 34.1 | 65.4 | 119.3 | 0.7 |
| 747 | Normal | 20190821 | 23 | 4.5 | 201.9 | 51.3 | 76.3 | 122.2 | 0.5 |
| 751 | Normal | 20190822 | 26 | 7.0 | 186.0 | 32.9 | 59.1 | 83.9  | 0.5 |
| 753 | Normal | 20190823 | 35 | 4.5 | 135.5 | 43.1 | 66.6 | 124.7 | 0.3 |
| 760 | Normal | 20190826 | 40 | 1.5 | 233.8 | 35.2 | 53.4 | 88.4  | 0.7 |
| 761 | Normal | 20190826 | 30 | 2.0 | 108.9 | 39.1 | 64.0 | 100.8 | 0.9 |
| 765 | Normal | 20190827 | 34 | 2.5 | 332.1 | 52.0 | 80.0 | 129.5 | 0.4 |
| 772 | Normal | 20190829 | 29 | 4.5 | 82.4  | 38.7 | 58.1 | 112.8 | 0.5 |
| 777 | Normal | 20190831 | 32 | 1.5 | 143.5 | 46.3 | 77.3 | 109.9 | 0.5 |
| 779 | Normal | 20190803 | 25 | 1.0 | 119.5 | 40.0 | 61.3 | /     | 0.9 |
| 786 | Normal | 20190805 | 29 | 6.0 | 278.9 | 37.2 | 62.9 | 108.8 | 0.7 |
| 787 | Normal | 20190805 | 27 | 1.0 | 188.6 | 45.6 | 64.8 | /     | 1.0 |
| 789 | Normal | 20190806 | 40 | 3.5 | 199.2 | 49.3 | 69.3 | 122.1 | 0.4 |
| 791 | Normal | 20190806 | 32 | 5.0 | 193.9 | 48.0 | 78.6 | 118.8 | 0.4 |
| 816 | Normal | 20190812 | 28 | 2.0 | 244.4 | 43.8 | 70.2 | 127.1 | 0.6 |
| 824 | Normal | 20190814 | 36 | 2.0 | 232.9 | 40.6 | 68.7 | 117.4 | 0.6 |
| 828 | Normal | 20190815 | 37 | 2.0 | 186.0 | 37.2 | 53.4 | 103.7 | 0.5 |
| 829 | Normal | 20190708 | 30 | 5.5 | 286.9 | 37.1 | 75.1 | 123.9 | 0.7 |

|      |        |           |    |     |       |      |      |       |     |
|------|--------|-----------|----|-----|-------|------|------|-------|-----|
| 833  | Normal | 20190709  | 28 | 1.0 | 536.6 | 44.5 | 73.2 | 90.8  | 0.6 |
| 840  | Normal | 20190711  | 27 | 2.0 | 193.9 | 34.2 | 63.0 | 108.8 | 0.6 |
| 841  | Normal | 20190711  | 32 | 2.0 | 178.0 | 52.3 | 71.7 | 119.0 | 0.5 |
| 843  | Normal | 220190713 | 28 | 4.0 | 313.5 | 49.1 | 80.5 | 129.1 | 0.7 |
| 844  | Normal | 20190715  | 31 | 1.0 | 154.1 | 35.8 | 47.4 | 86.4  | 0.7 |
| 845  | Normal | 20190715  | 29 | 6.0 | 130.2 | 57.1 | 77.5 | 126.0 | 0.6 |
| 848  | Normal | 20190716  | 28 | 2.0 | 228.5 | 36.0 | 53.8 | 111.5 | 0.8 |
| 859  | Normal | 20190719  | 34 | 4.5 | 116.9 | 45.5 | 61.4 | 88.6  | 0.9 |
| 864  | Normal | 20192722  | 32 | 1.0 | 146.1 | 42.3 | 61.8 | 109.2 | 0.6 |
| 865  | Normal | 20193722  | 30 | 6.0 | 122.2 | 49.1 | 73.9 | 118.5 | 0.4 |
| 867  | Normal | 20190731  | 31 | 0.5 | 239.1 | 36.7 | 55.6 | 109.9 | 0.4 |
| 869  | Normal | 20190801  | 27 | 4.0 | 172.7 | 38.5 | 66.2 | 120.4 | 0.7 |
| 870  | Normal | 20190801  | 36 | 1.0 | 130.2 | 37.9 | 58.3 | 100.5 | 0.9 |
| 877  | Normal | 20190803  | 26 | 2.0 | 188.6 | 45.1 | 74.7 | 115.9 | 0.6 |
| 878  | Normal | 20190803  | 33 | 4.0 | 183.3 | 50.8 | 67.7 | 107.4 | 0.8 |
| 879  | Normal | 20190622  | 36 | 4.5 | 172.7 | 41.5 | 62.7 | 115.9 | 1.0 |
| 887  | Normal | 20190625  | 42 | 2.0 | 244.4 | 35.8 | 55.0 | 100.7 | 0.9 |
| 888  | Normal | 20190625  | 30 | 3.0 | 276.3 | 63.5 | 80.8 | 113.0 | 0.7 |
| 890  | Normal | 20190626  | 27 | 3.0 | 345.3 | 53.8 | 81.5 | 135.0 | 0.3 |
| 893  | Normal | 20190626  | 27 | 3.0 | 212.5 | 38.8 | 66.7 | 112.5 | 0.4 |
| 895  | Normal | 20190626  | 28 | 7.0 | 191.3 | 44.3 | 58.9 | 98.1  | 1.0 |
| 908  | Normal | 20190701  | 29 | 1.0 | 77.0  | 33.9 | 48.2 | /     | 1.0 |
| 911  | Normal | 20190702  | 34 | 5.5 | 132.8 | 36.0 | 54.0 | 100.8 | 0.5 |
| 914  | Normal | 20190703  | 29 | 4.0 | 238.4 | 41.3 | 73.3 | 120.6 | 0.8 |
| 928  | Normal | 20190603  | 30 | 4.0 | 167.4 | 46.0 | 62.3 | 100.9 | 0.5 |
| 931  | Normal | 20190604  | 37 | 0.2 | 172.7 | 32.3 | 58.5 | 101.7 | 0.9 |
| 932  | Normal | 20190605  | 28 | 2.0 | 148.8 | 57.2 | 69.7 | 115.6 | 0.8 |
| 933  | Normal | 20190605  | 26 | 5.0 | 156.7 | 33.9 | 53.8 | 99.1  | 0.6 |
| 934  | Normal | 20190606  | 30 | 5.5 | 188.6 | 46.5 | 71.9 | 128.2 | 0.4 |
| 936  | Normal | 20190606  | 28 | 2.5 | 148.8 | 58.9 | 76.8 | 115.6 | 0.7 |
| 942  | Normal | 20190611  | 28 | 3.0 | 164.7 | 52.8 | 70.9 | 119.4 | 0.5 |
| 946  | Normal | 20190612  | 32 | 2.0 | 199.2 | 50.7 | 79.1 | 122.6 | 0.7 |
| 956  | Normal | 20190615  | 30 | 3.0 | 191.3 | 37.9 | 55.3 | 92.6  | 1.0 |
| 960  | Normal | 20190617  | 31 | 3.0 | 255.9 | 53.9 | 80.9 | /     | 0.0 |
| 972  | Normal | 20190621  | 24 | 1.0 | 212.5 | 40.1 | 68.9 | 108.4 | 1.0 |
| 978  | Normal | 20190514  | 32 | 5.0 | 241.7 | 39.6 | 73.7 | 118.3 | 0.7 |
| 980  | Normal | 20190514  | 27 | 4.0 | 156.7 | 42.4 | 74.6 | 121.5 | 1.0 |
| 986  | Normal | 20190516  | 29 | 1.0 | 164.7 | 51.6 | 71.0 | 115.2 | 0.5 |
| 987  | Normal | 20190517  | 28 | 2.0 | 140.8 | 47.1 | 68.3 | 93.1  | 0.8 |
| 997  | Normal | 20190522  | 31 | 2.0 | 164.7 | 48.4 | 61.3 | 112.5 | 0.6 |
| 1003 | Normal | 20190523  | 30 | 5.0 | 201.9 | 53.9 | 81.5 | 120.0 | 0.6 |
| 1005 | Normal | 20190524  | 23 | 3.5 | 159.4 | 45.0 | 75.0 | 119.4 | 0.7 |
| 1011 | Normal | 20190528  | 28 | 2.0 | 170.0 | 37.5 | 68.8 | 123.1 | 1.0 |
| 1014 | Normal | 20190529  | 30 | 4.5 | 120.0 | 52.1 | 72.0 | /     | 0.9 |
| 1016 | Normal | 20190529  | 30 | 5.0 | 154.1 | 34.5 | 70.7 | /     | 0.6 |

|      |        |          |    |     |       |      |      |       |     |
|------|--------|----------|----|-----|-------|------|------|-------|-----|
| 1018 | Normal | 20190529 | 41 | 3.5 | 199.2 | 60.0 | 78.7 | 116.1 | 0.4 |
| 1019 | Normal | 20190530 | 38 | 2.0 | 217.8 | 48.8 | 78.1 | 128.2 | 0.7 |
| 1020 | Normal | 20190530 | 37 | 2.5 | 95.6  | 44.5 | 57.0 | 97.6  | 0.6 |
| 1023 | Normal | 20190601 | 28 | 1.0 | 207.2 | 45.9 | 69.2 | 108.5 | 0.9 |
| 1028 | Normal | 20190429 | 23 | 4.5 | 172.7 | 36.5 | 53.8 | 101.4 | 0.9 |
| 1031 | Normal | 20190429 | 36 | 5.5 | 146.1 | 35.5 | 60.5 | 81.3  | 0.9 |
| 1041 | Normal | 20190506 | 26 | 5.5 | 292.2 | 47.2 | 75.4 | /     | 0.5 |
| 1065 | Normal | 20190511 | 28 | 2.0 | 164.7 | 35.4 | 56.4 | /     | 1.0 |
| 1069 | Normal | 20190513 | 32 | 1.5 | 140.8 | 41.5 | 64.1 | /     | 0.5 |
| 1079 | Normal | 20190415 | 31 | 1.0 | 138.1 | 40.3 | 54.1 | /     | 0.8 |
| 1080 | Normal | 20190415 | 30 | 6.0 | 313.5 | 50.0 | 82.2 | 116.4 | 0.9 |
| 1086 | Normal | 20190416 | 28 | 4.0 | 166.0 | 38.4 | 70.4 | 114.1 | 0.6 |
| 1098 | Normal | 20190418 | 29 | 3.0 | 278.9 | 32.4 | 63.8 | 113.5 | 0.4 |
| 1099 | Normal | 20190419 | 28 | 5.5 | 186.0 | 50.0 | 70.0 | 100.3 | 0.9 |
| 1101 | Normal | 20190419 | 29 | 2.0 | 201.9 | 51.3 | 76.3 | 110.6 | 0.8 |
| 1108 | Normal | 20190422 | 36 | 2.0 | 236.4 | 43.3 | 65.8 | 118.0 | 0.7 |
| 1109 | Normal | 20190422 | 18 | 0.3 | 167.4 | 39.3 | 63.1 | 99.5  | 1.0 |
| 1111 | Normal | 20190423 | 28 | 0.5 | 199.2 | 52.0 | 69.3 | 122.4 | 1.0 |
| 1113 | Normal | 20190423 | 29 | 2.0 | 265.7 | 38.0 | 50.7 | 109.3 | 0.8 |
| 1114 | Normal | 20190424 | 37 | 2.0 | 106.8 | 40.3 | 54.7 | 98.2  | 0.7 |
| 1123 | Normal | 20190425 | 28 | 1.0 | 201.9 | 34.3 | 64.1 | 100.9 | 0.8 |
| 1128 | Normal | 20190329 | 30 | 5.0 | 196.6 | 50.0 | 73.0 | 100.2 | 0.8 |
| 1132 | Normal | 20190330 | 22 | 7.0 | 186.0 | 52.8 | 71.4 | 127.4 | 0.5 |
| 1134 | Normal | 20190330 | 29 | 3.0 | 231.1 | 57.5 | 77.4 | 100.8 | 0.4 |
| 1142 | Normal | 20190402 | 39 | 5.0 | 167.4 | 34.5 | 58.7 | /     | 0.7 |
| 1147 | Normal | 20190402 | 28 | 3.0 | 164.7 | 35.5 | 54.5 | 119.4 | 0.4 |
| 1150 | Normal | 20190408 | 28 | 1.0 | 103.6 | 35.4 | 51.9 | 72.2  | 1.0 |
| 1151 | Normal | 20190408 | 34 | 1.5 | 252.4 | 56.2 | 72.7 | 108.4 | 0.9 |
| 1153 | Normal | 20190408 | 33 | 4.0 | 160.7 | 56.2 | 76.0 | 120.1 | 0.6 |
| 1155 | Normal | 20190409 | 27 | 1.0 | 95.6  | 35.1 | 51.4 | 101.5 | 0.9 |
| 1159 | Normal | 20190409 | 35 | 3.5 | 127.5 | 41.4 | 57.2 | 122.0 | 0.4 |
| 1166 | Normal | 20190410 | 31 | 5.5 | 223.1 | 36.9 | 71.4 | 114.9 | 0.5 |
| 1176 | Normal | 20190318 | 22 | 1.5 | 182.0 | 38.0 | 58.4 | 116.5 | 0.7 |
| 1179 | Normal | 20190318 | 27 | 3.0 | 223.1 | 36.9 | 73.8 | 120.9 | 0.3 |
| 1189 | Normal | 20190320 | 29 | 4.0 | 172.7 | 47.7 | 73.9 | 122.2 | 0.4 |
| 1191 | Normal | 20190320 | 25 | 2.5 | 116.9 | 39.0 | 58.3 | 99.1  | 0.8 |
| 1205 | Normal | 20190325 | 27 | 2.0 | 260.3 | 39.8 | 61.2 | 85.1  | 0.6 |
| 1209 | Normal | 20190326 | 36 | 4.0 | 252.4 | 41.1 | 74.8 | 109.3 | 1.0 |
| 1210 | Normal | 20190326 | 34 | 2.0 | 111.6 | 52.4 | 76.2 | 113.8 | 0.9 |
| 1211 | Normal | 20190327 | 32 | 2.0 | 255.0 | 49.0 | 79.2 | 117.0 | 0.4 |
| 1214 | Normal | 20190327 | 29 | 4.0 | 111.6 | 36.2 | 53.8 | 102.8 | 0.5 |
| 1217 | Normal | 20190327 | 28 | 2.0 | 433.0 | 57.0 | 74.8 | 130.3 | 0.7 |
| 1220 | Normal | 20190328 | 41 | 0.5 | 249.7 | 41.5 | 71.3 | 129.4 | 0.4 |
| 1222 | Normal | 20190328 | 42 | 5.0 | 79.7  | 56.6 | 69.0 | 114.6 | 0.4 |
| 1225 | Normal | 20190221 | 33 | 4.0 | 151.4 | 40.4 | 57.9 | 93.3  | 1.0 |

|      |        |          |    |     |       |      |      |       |     |
|------|--------|----------|----|-----|-------|------|------|-------|-----|
| 1226 | Normal | 20190221 | 28 | 2.0 | 178.0 | 59.2 | 73.1 | 115.8 | 0.4 |
| 1234 | Normal | 20190223 | 34 | 2.5 | 111.6 | 35.7 | 50.4 | 97.3  | 0.5 |
| 1241 | Normal | 20190225 | 26 | 4.5 | 172.7 | 37.2 | 55.7 | 99.8  | 0.5 |
| 1249 | Normal | 20190226 | 35 | 5.0 | 175.3 | 57.6 | 77.3 | 138.0 | 0.4 |
| 1259 | Normal | 20190228 | 32 | 2.0 | 102.1 | 52.0 | 69.5 | 113.8 | 0.6 |
| 1287 | Normal | 20190309 | 29 | 3.0 | 164.7 | 48.4 | 66.9 | 124.1 | 0.5 |
| 1300 | Normal | 20190311 | 28 | 2.0 | 273.6 | 44.7 | 73.8 | 119.5 | 0.6 |
| 1310 | Normal | 20190314 | 33 | 3.0 | 135.5 | 35.3 | 50.2 | 94.4  | 1.0 |
| 1317 | Normal | 20190316 | 29 | 4.5 | 156.7 | 35.1 | 63.9 | 102.8 | 0.9 |
| 1319 | Normal | 20190316 | 42 | 1.5 | 263.0 | 49.5 | 77.1 | 120.5 | 1.0 |
| 1320 | Normal | 20190316 | 29 | 3.0 | 223.1 | 64.3 | 82.2 | 123.9 | 0.6 |
| 1335 | Normal | 20190214 | 35 | 5.0 | 127.5 | 45.9 | 66.7 | 114.3 | 0.2 |
| 1337 | Normal | 20190214 | 31 | 2.0 | 188.6 | 62.5 | 83.2 | 130.9 | 0.4 |
| 1341 | Normal | 20190215 | 29 | 5.0 | 191.3 | 38.9 | 58.3 | 99.5  | 1.0 |
| 1355 | Normal | 20190218 | 20 | 6.5 | 201.9 | 64.0 | 81.5 | 130.5 | 0.4 |
| 1362 | Normal | 20190219 | 30 | 5.0 | 186.0 | 54.2 | 71.8 | 122.7 | 0.9 |
| 1365 | Normal | 20190220 | 41 | 6.0 | 143.5 | 57.4 | 79.6 | 62.5  | 1.0 |
| 1368 | Normal | 20190220 | 29 | 4.5 | 92.6  | 43.0 | 63.1 | 62.5  | 1.0 |
| 1369 | Normal | 20190221 | 33 | 2.5 | 167.4 | 34.9 | 58.7 | /     | 0.7 |
| 1371 | Normal | 20190221 | 27 | 5.5 | 154.1 | 50.0 | 78.4 | 129.0 | 0.7 |
| 1373 | Normal | 20190116 | 37 | 3.0 | 191.3 | 45.4 | 74.6 | 120.9 | 0.7 |
| 1378 | Normal | 20190119 | 19 | 1.0 | 93.0  | 40.0 | 55.7 | /     | 0.7 |
| 1379 | Normal | 20190119 | 25 | 2.0 | 204.6 | 42.9 | 65.6 | 109.7 | 0.5 |
| 1380 | Normal | 20190121 | 31 | 5.0 | 102.3 | 38.9 | 57.9 | 109.2 | 0.6 |
| 1385 | Normal | 20190122 | 34 | 1.0 | 124.9 | 53.2 | 71.9 | 121.6 | 0.4 |
| 1393 | Normal | 20190124 | 32 | 2.5 | 201.9 | 36.8 | 65.1 | 109.7 | 1.0 |
| 1403 | Normal | 20190129 | 22 | 3.0 | 90.3  | 38.2 | 57.1 | 95.4  | 0.7 |
| 1407 | Normal | 20190130 | 26 | 8.0 | 143.5 | 40.0 | 55.2 | 91.6  | 0.8 |
| 1415 | Normal | 20190211 | 40 | 1.0 | 85.0  | 43.8 | 67.9 | /     | 0.6 |
| 1422 | Normal | 20190102 | 28 | 5.0 | 148.8 | 41.1 | 67.9 | 109.1 | 0.3 |
| 1428 | Normal | 20190104 | 37 | 4.5 | 199.2 | 48.5 | 77.4 | 122.0 | 0.4 |
| 1432 | Normal | 20190107 | 33 | 1.5 | 172.7 | 35.4 | 53.9 | /     | 1.0 |
| 1438 | Normal | 20190108 | 25 | 2.0 | 308.2 | 49.1 | 77.5 | 122.8 | 0.5 |
| 1457 | Normal | 20190114 | 31 | 2.5 | 186.0 | 42.9 | 75.8 | /     | 0.3 |
| 1460 | Normal | 20190115 | 28 | 1.5 | 132.8 | 40.0 | 54.0 | 97.1  | 0.5 |
| 1461 | Normal | 20190115 | 36 | 2.0 | 148.8 | 37.5 | 58.9 | 90.6  | 1.0 |
| 1469 | Normal | 20201130 | 38 | 2.0 | 433.0 | 50.3 | 82.2 | 97.7  | 0.9 |
| 1472 | Normal | 20201130 | 36 | 2.5 | 329.4 | 39.5 | 71.0 | 116.4 | 0.8 |
| 1473 | Normal | 20201128 | 25 | 1.5 | 122.2 | 34.8 | 60.9 | 93.6  | 0.8 |
| 1483 | Normal | 20201125 | 34 | 2.5 | 334.7 | 48.4 | 68.2 | 111.2 | 0.5 |
| 29   | Leu    | 20201104 | 30 | 3.0 | 201.9 | 39.5 | 50.0 | 75.7  | 1.3 |
| 34   | Leu    | 20201103 | 33 | 2.0 | 103.6 | 43.6 | 55.1 | 90.6  | 1.1 |
| 43   | Leu    | 20201029 | 31 | 1.0 | 116.9 | 50.0 | 69.5 | 94.4  | 1.1 |
| 47   | Leu    | 20201027 | 31 | 5.0 | 406.4 | 41.8 | 67.9 | 80.8  | 1.2 |
| 65   | Leu    | 20201019 | 21 | 2.5 | 209.9 | 34.6 | 50.2 | 75.5  | 1.3 |

|     |     |          |    |     |       |      |      |       |     |
|-----|-----|----------|----|-----|-------|------|------|-------|-----|
| 70  | Leu | 20201016 | 29 | 2.5 | 209.9 | 37.9 | 56.1 | 77.4  | 1.8 |
| 72  | Leu | 20201016 | 31 | 2.0 | 379.9 | 37.1 | 68.6 | 90.3  | 1.5 |
| 73  | Leu | 20201016 | 30 | 2.5 | 247.1 | 36.6 | 66.7 | 91.8  | 1.4 |
| 87  | Leu | 20200930 | 22 | 3.0 | 151.4 | 36.9 | 50.6 | 73.8  | 1.3 |
| 90  | Leu | 20200930 | 27 | 2.5 | 156.7 | 35.6 | 55.9 | 92.3  | 1.4 |
| 92  | Leu | 20200929 | 29 | 4.5 | 175.3 | 48.5 | 66.7 | 108.4 | 1.1 |
| 93  | Leu | 20200928 | 33 | 4.0 | 233.8 | 43.2 | 70.5 | 98.3  | 1.7 |
| 101 | Leu | 20200923 | 30 | 3.5 | 249.7 | 43.3 | 67.8 | 98.6  | 1.1 |
| 103 | Leu | 20200922 | 31 | 3.0 | 180.6 | 38.3 | 55.5 | 99.7  | 1.3 |
| 118 | Leu | 20200910 | 35 | 1.5 | 183.3 | 40.5 | 57.4 | 105.3 | 1.9 |
| 120 | Leu | 20200910 | 25 | 2.0 | 252.4 | 40.0 | 54.0 | 70.3  | 1.3 |
| 125 | Leu | 20200909 | 26 | 4.5 | 69.1  | 34.6 | 50.8 | 73.5  | 1.1 |
| 128 | Leu | 20200908 | 28 | 2.0 | 210.7 | 42.9 | 69.4 | 82.1  | 1.4 |
| 132 | Leu | 20200907 | 27 | 4.0 | 204.6 | 32.5 | 61.1 | /     | 1.5 |
| 147 | Leu | 20200901 | 30 | 2.5 | 178.0 | 47.8 | 76.7 | 106.8 | 1.2 |
| 157 | Leu | 20200826 | 29 | 3.0 | 167.4 | 34.9 | 68.2 | 70.5  | 1.4 |
| 160 | Leu | 20200826 | 24 | 6.0 | 164.7 | 45.2 | 66.2 | 89.0  | 1.4 |
| 166 | Leu | 20200824 | 28 | 1.0 | 132.8 | 52.0 | 76.5 | 95.7  | 1.1 |
| 167 | Leu | 20200824 | 31 | 3.0 | 176.0 | 39.3 | 72.1 | 108.3 | 1.1 |
| 174 | Leu | 20200819 | 32 | 6.0 | 348.0 | 35.1 | 69.1 | 85.1  | 1.2 |
| 175 | Leu | 20200818 | 29 | 1.5 | 284.2 | 34.6 | 58.9 | 70.5  | 1.1 |
| 176 | Leu | 20200818 | 26 | 5.0 | 288.2 | 42.4 | 74.7 | 105.9 | 1.1 |
| 181 | Leu | 20200817 | 31 | 1.0 | 103.6 | 33.3 | 57.7 | 90.0  | 1.4 |
| 182 | Leu | 20200817 | 29 | 2.0 | 209.9 | 34.2 | 62.0 | 89.4  | 1.2 |
| 186 | Leu | 20200814 | 36 | 1.5 | 278.9 | 33.4 | 61.0 | 92.8  | 1.2 |
| 187 | Leu | 20200814 | 35 | 4.5 | 122.2 | 36.9 | 55.2 | 99.4  | 1.2 |
| 191 | Leu | 20200812 | 29 | 5.0 | 154.1 | 36.2 | 60.3 | 89.7  | 2.5 |
| 197 | Leu | 20200811 | 22 | 2.0 | 181.5 | 41.0 | 71.7 | 107.4 | 1.1 |
| 199 | Leu | 20200810 | 31 | 5.5 | 131.8 | 40.3 | 66.1 | 99.2  | 1.3 |
| 208 | Leu | 20200804 | 19 | 5.0 | 201.9 | 35.5 | 61.8 | 92.4  | 1.5 |
| 209 | Leu | 20200804 | 31 | 2.0 | 199.2 | 46.7 | 77.4 | 106.9 | 1.4 |
| 213 | Leu | 20200804 | 31 | 4.0 | 186.0 | 41.5 | 58.6 | 90.3  | 2.8 |
| 218 | Leu | 20200803 | 31 | 4.0 | 132.8 | 36.0 | 60.4 | 94.0  | 1.1 |
| 222 | Leu | 20200731 | 38 | 2.0 | 241.7 | 44.0 | 78.1 | 95.6  | 1.1 |
| 227 | Leu | 20200730 | 34 | 3.0 | 265.7 | 40.7 | 72.4 | 109.2 | 1.5 |
| 240 | Leu | 20200724 | 32 | 5.0 | 199.2 | 45.3 | 70.6 | 100.9 | 1.3 |
| 241 | Leu | 20200724 | 24 | 2.0 | 114.2 | 33.4 | 53.6 | 70.4  | 1.4 |
| 248 | Leu | 20200722 | 27 | 2.0 | 191.3 | 33.3 | 53.2 | 86.0  | 1.1 |
| 256 | Leu | 20200720 | 17 | 3.0 | 148.8 | 39.4 | 59.0 | 88.2  | 1.4 |
| 257 | Leu | 20200720 | 35 | 3.0 | 138.1 | 46.2 | 71.2 | 115.9 | 1.2 |
| 258 | Leu | 20200717 | 33 | 6.0 | 188.6 | 43.6 | 73.2 | /     | 1.6 |
| 259 | Leu | 20200717 | 37 | 2.0 | 433.0 | 36.8 | 70.5 | 90.4  | 1.2 |
| 262 | Leu | 20200715 | 38 | 5.5 | 127.5 | 39.6 | 70.0 | 108.4 | 1.1 |
| 264 | Leu | 20200714 | 33 | 3.5 | 252.4 | 55.8 | 79.3 | 108.9 | 1.4 |
| 270 | Leu | 20200708 | 36 | 4.0 | 135.5 | 38.7 | 71.1 | 81.8  | 1.2 |



|     |     |          |    |     |       |      |      |       |     |
|-----|-----|----------|----|-----|-------|------|------|-------|-----|
| 271 | Leu | 20200708 | 31 | 2.0 | 116.9 | 33.7 | 61.0 | /     | 2.3 |
| 273 | Leu | 20200707 | 25 | 2.5 | 170.0 | 34.7 | 52.7 | 80.7  | 1.5 |
| 275 | Leu | 20200706 | 30 | 3.5 | 138.1 | 36.5 | 60.7 | 83.1  | 1.6 |
| 280 | Leu | 20200703 | 30 | 3.5 | 231.1 | 44.8 | 77.0 | 120.3 | 1.1 |
| 281 | Leu | 20200703 | 29 | 3.5 | 196.6 | 50.0 | 71.6 | 116.1 | 1.1 |
| 304 | Leu | 20200622 | 20 | 5.5 | 207.2 | 35.9 | 50.0 | 96.8  | 1.2 |
| 305 | Leu | 20200619 | 29 | 2.0 | 103.6 | 36.3 | 56.4 | 98.3  | 1.1 |
| 311 | Leu | 20200615 | 30 | 3.0 | 100.9 | 39.5 | 68.4 | 96.4  | 1.3 |
| 315 | Leu | 20200610 | 26 | 2.5 | 236.4 | 34.8 | 67.4 | 91.7  | 3.5 |
| 319 | Leu | 20200608 | 32 | 3.0 | 132.8 | 48.0 | 80.0 | 111.0 | 1.3 |
| 324 | Leu | 20200605 | 28 | 2.5 | 159.4 | 35.0 | 58.3 | 93.3  | 1.6 |
| 326 | Leu | 20200603 | 27 | 1.0 | 196.6 | 33.8 | 67.6 | 97.3  | 1.4 |
| 327 | Leu | 20200603 | 28 | 2.0 | 215.2 | 43.2 | 74.1 | 120.2 | 1.6 |
| 330 | Leu | 20200602 | 30 | 5.0 | 146.1 | 40.0 | 74.5 | 107.6 | 1.1 |
| 334 | Leu | 20200529 | 30 | 0.5 | 103.6 | 33.3 | 61.8 | 95.8  | 1.2 |
| 338 | Leu | 20200525 | 27 | 1.0 | 225.8 | 44.7 | 65.9 | 99.5  | 1.3 |
| 341 | Leu | 20200605 | 26 | 4.0 | 191.3 | 47.2 | 75.0 | 90.7  | 1.1 |
| 345 | Leu | 20200520 | 36 | 2.5 | 103.6 | 41.4 | 55.1 | 93.3  | 1.1 |
| 349 | Leu | 20200514 | 25 | 4.0 | 130.2 | 44.9 | 63.3 | 100.8 | 1.1 |
| 357 | Leu | 20200513 | 35 | 1.5 | 100.9 | 34.3 | 58.0 | 93.0  | 1.1 |
| 370 | Leu | 20200427 | 34 | 2.0 | 183.3 | 33.3 | 58.9 | 99.3  | 1.3 |
| 377 | Leu | 20200108 | 31 | 4.5 | 193.9 | 48.0 | 78.1 | 120.3 | 1.4 |
| 384 | Leu | 20200107 | 29 | 4.0 | 73.7  | 32.4 | 43.2 | 61.8  | 1.1 |
| 397 | Leu | 20191231 | 30 | 2.0 | 148.8 | 33.9 | 51.3 | 80.6  | 1.1 |
| 403 | Leu | 20191228 | 38 | 4.5 | 143.5 | 42.6 | 70.4 | 119.0 | 1.3 |
| 414 | Leu | 20191223 | 24 | 3.5 | 172.7 | 46.2 | 70.8 | 108.3 | 1.1 |
| 420 | Leu | 20191223 | 34 | 5.0 | 79.7  | 33.4 | 60.1 | 100.7 | 1.1 |
| 426 | Leu | 20191221 | 26 | 4.0 | 151.4 | 33.3 | 60.1 | 108.8 | 1.2 |
| 427 | Leu | 20191219 | 28 | 2.0 | 286.9 | 38.9 | 68.1 | 105.8 | 1.3 |
| 428 | Leu | 20191218 | 34 | 5.0 | 119.5 | 32.6 | 60.0 | 99.5  | 1.3 |
| 429 | Leu | 20191218 | 26 | 5.0 | 160.1 | 46.5 | 69.7 | /     | 1.8 |
| 431 | Leu | 20191227 | 25 | 3.5 | 139.7 | 47.5 | 74.1 | 105.9 | 1.3 |
| 432 | Leu | 20191217 | 27 | 3.0 | 193.9 | 41.1 | 71.2 | 100.4 | 1.2 |
| 435 | Leu | 20191216 | 34 | 2.5 | 151.4 | 37.9 | 60.4 | 97.6  | 1.1 |
| 443 | Leu | 20191211 | 29 | 3.5 | 154.1 | 34.5 | 65.2 | 109.4 | 1.1 |
| 444 | Leu | 20191211 | 30 | 3.0 | 193.9 | 41.1 | 58.9 | 100.3 | 2.8 |
| 446 | Leu | 20191210 | 28 | 5.0 | 164.7 | 42.0 | 56.8 | 98.0  | 1.3 |
| 451 | Leu | 20191209 | 29 | 5.5 | 260.3 | 33.6 | 50.9 | 96.6  | 1.3 |
| 454 | Leu | 20191205 | 29 | 3.0 | 389.2 | 43.0 | 79.5 | 122.4 | 1.5 |
| 457 | Leu | 20191204 | 38 | 2.0 | 170.0 | 34.3 | 56.2 | 90.1  | 1.3 |
| 461 | Leu | 20191203 | 26 | 4.5 | 106.3 | 32.5 | 62.0 | 112.5 | 1.7 |
| 464 | Leu | 20191130 | 30 | 2.0 | 162.0 | 39.3 | 62.3 | 80.4  | 1.3 |
| 466 | Leu | 20191202 | 36 | 5.0 | 294.9 | 44.1 | 62.1 | /     | 1.5 |
| 479 | Leu | 20191123 | 32 | 1.0 | 127.5 | 37.5 | 56.3 | 93.4  | 1.7 |
| 502 | Leu | 20191114 | 36 | 1.5 | 329.4 | 32.2 | 70.9 | 90.6  | 1.4 |

|     |     |          |    |     |       |      |      |       |     |
|-----|-----|----------|----|-----|-------|------|------|-------|-----|
| 504 | Leu | 20191113 | 31 | 3.0 | 55.8  | 33.7 | 49.1 | 69.4  | 1.8 |
| 507 | Leu | 20191113 | 29 | 0.8 | 130.2 | 35.1 | 51.0 | 77.3  | 1.6 |
| 508 | Leu | 20191112 | 27 | 5.0 | 116.9 | 43.2 | 65.9 | 94.9  | 1.2 |
| 516 | Leu | 20191029 | 30 | 2.0 | 167.4 | 33.3 | 56.3 | 80.4  | 1.3 |
| 519 | Leu | 20191030 | 33 | 3.0 | 255.0 | 37.5 | 68.8 | 105.6 | 1.1 |
| 529 | Leu | 20191101 | 31 | 7.5 | 207.2 | 34.6 | 56.0 | 100.9 | 1.8 |
| 534 | Leu | 20191102 | 32 | 3.0 | 106.3 | 35.0 | 45.0 | 67.5  | 1.1 |
| 538 | Leu | 20191104 | 26 | 2.0 | 247.1 | 33.3 | 56.0 | 83.1  | 1.5 |
| 546 | Leu | 20191106 | 28 | 0.5 | 140.8 | 38.7 | 54.1 | 80.8  | 1.6 |
| 548 | Leu | 20191106 | 34 | 1.5 | 164.7 | 33.9 | 58.1 | 99.1  | 1.4 |
| 549 | Leu | 20191106 | 26 | 1.0 | 152.7 | 41.7 | 60.8 | 107.2 | 1.5 |
| 561 | Leu | 20191016 | 36 | 6.0 | 148.8 | 32.1 | 52.8 | 99.2  | 1.1 |
| 563 | Leu | 20191016 | 37 | 2.0 | 164.7 | 36.5 | 60.7 | 93.4  | 1.1 |
| 564 | Leu | 20191016 | 25 | 5.0 | 228.5 | 39.1 | 67.0 | 117.2 | 1.6 |
| 569 | Leu | 20191016 | 41 | 0.5 | 255.0 | 32.3 | 61.1 | 83.8  | 2.0 |
| 570 | Leu | 20191017 | 29 | 2.0 | 151.4 | 45.6 | 61.4 | 90.8  | 1.1 |
| 587 | Leu | 20191021 | 26 | 1.0 | 87.7  | 32.0 | 55.5 | 77.0  | 1.6 |
| 590 | Leu | 20191021 | 28 | 3.0 | 132.8 | 52.0 | 70.0 | /     | 1.1 |
| 593 | Leu | 20191022 | 29 | 1.0 | 419.7 | 32.9 | 68.3 | 82.5  | 1.3 |
| 596 | Leu | 20191023 | 30 | 2.0 | 108.9 | 39.1 | 57.6 | 100.7 | 1.1 |
| 601 | Leu | 20191024 | 30 | 1.0 | 146.1 | 49.0 | 65.4 | 93.7  | 1.2 |
| 603 | Leu | 20191024 | 28 | 6.0 | 188.6 | 36.6 | 67.6 | 109.9 | 1.1 |
| 604 | Leu | 20191026 | 30 | 0.5 | 188.6 | 32.4 | 50.7 | 83.0  | 1.5 |
| 605 | Leu | 20191026 | 21 | 2.0 | 148.8 | 34.0 | 55.4 | 89.4  | 1.3 |
| 618 | Leu | 20190926 | 22 | 2.2 | 178.0 | 35.8 | 55.2 | 69.0  | 1.4 |
| 630 | Leu | 20191009 | 26 | 1.0 | 140.8 | 39.6 | 61.9 | 93.7  | 1.4 |
| 636 | Leu | 20191010 | 30 | 3.0 | 164.7 | 38.7 | 69.3 | 109.4 | 1.4 |
| 637 | Leu | 20191012 | 26 | 2.0 | 151.4 | 33.3 | 58.6 | 101.9 | 1.4 |
| 638 | Leu | 20191012 | 29 | 2.0 | 108.9 | 37.6 | 51.2 | 80.4  | 1.2 |
| 639 | Leu | 20191012 | 34 | 1.0 | 180.6 | 56.0 | 76.6 | 110.6 | 1.7 |
| 640 | Leu | 20191012 | 29 | 3.0 | 183.3 | 42.0 | 64.7 | 99.3  | 1.2 |
| 643 | Leu | 20191014 | 20 | 0.5 | 252.4 | 43.1 | 65.6 | 109.1 | 1.4 |
| 649 | Leu | 20191014 | 34 | 1.5 | 146.1 | 41.8 | 54.5 | 94.0  | 1.5 |
| 651 | Leu | 20191014 | 21 | 2.0 | 276.3 | 34.6 | 72.1 | 97.2  | 2.3 |
| 661 | Leu | 20190909 | 34 | 2.0 | 122.2 | 41.3 | 63.0 | 108.8 | 1.9 |
| 662 | Leu | 20190909 | 28 | 3.0 | 236.4 | 53.9 | 76.0 | 114.7 | 1.5 |
| 666 | Leu | 20190910 | 29 | 4.0 | 215.2 | 46.1 | 71.6 | 108.8 | 1.2 |
| 670 | Leu | 20190912 | 21 | 4.0 | 114.2 | 42.7 | 63.6 | 97.2  | 2.3 |
| 671 | Leu | 20190916 | 31 | 7.0 | 284.2 | 38.4 | 64.6 | 119.0 | 1.2 |
| 675 | Leu | 20190917 | 37 | 4.5 | 98.3  | 33.2 | 51.0 | 95.6  | 1.1 |
| 682 | Leu | 20190919 | 25 | 3.5 | 140.8 | 39.6 | 52.8 | 75.5  | 1.4 |
| 691 | Leu | 20190921 | 30 | 3.0 | 170.0 | 35.9 | 53.1 | 77.3  | 1.4 |
| 692 | Leu | 20190923 | 27 | 6.0 | 114.2 | 39.6 | 53.6 | 66.0  | 1.7 |
| 693 | Leu | 20190923 | 28 | 3.0 | 114.2 | 48.4 | 62.8 | 108.3 | 1.2 |
| 697 | Leu | 20190923 | 30 | 2.5 | 95.6  | 46.2 | 58.7 | 115.2 | 1.3 |

|     |     |          |    |     |       |      |      |       |     |
|-----|-----|----------|----|-----|-------|------|------|-------|-----|
| 703 | Leu | 20190925 | 30 | 2.0 | 180.6 | 35.3 | 67.7 | 109.1 | 1.2 |
| 715 | Leu | 20190902 | 32 | 2.0 | 178.0 | 40.3 | 62.7 | 105.7 | 1.3 |
| 724 | Leu | 20190907 | 39 | 4.5 | 130.2 | 33.8 | 56.2 | 98.3  | 1.1 |
| 725 | Leu | 20190906 | 27 | 3.0 | 108.9 | 39.0 | 62.5 | 96.2  | 1.5 |
| 734 | Leu | 20190817 | 35 | 2.0 | 154.1 | 34.5 | 53.5 | 93.5  | 1.1 |
| 748 | Leu | 20190821 | 26 | 4.5 | 146.1 | 48.7 | 67.2 | 108.7 | 1.2 |
| 755 | Leu | 20190824 | 31 | 1.5 | 132.8 | 32.4 | 52.4 | 99.7  | 1.5 |
| 766 | Leu | 20190827 | 30 | 2.0 | 172.7 | 50.8 | 66.2 | 104.6 | 1.1 |
| 768 | Leu | 20190828 | 32 | 7.0 | 186.0 | 44.3 | 61.4 | 97.3  | 1.5 |
| 782 | Leu | 20190805 | 31 | 1.0 | 154.1 | 39.6 | 53.4 | 71.1  | 1.2 |
| 788 | Leu | 20190806 | 34 | 1.0 | 132.8 | 33.5 | 50.5 | 80.4  | 2.5 |
| 790 | Leu | 20190806 | 21 | 2.0 | 103.6 | 41.0 | 54.2 | 91.2  | 1.7 |
| 793 | Leu | 20190806 | 22 | 4.0 | 156.7 | 37.3 | 52.6 | 88.0  | 1.4 |
| 799 | Leu | 20190807 | 35 | 2.0 | 146.1 | 34.5 | 50.9 | 79.2  | 1.5 |
| 809 | Leu | 20190812 | 30 | 4.0 | 132.8 | 36.0 | 62.8 | 118.4 | 1.3 |
| 812 | Leu | 20190812 | 24 | 3.0 | 140.8 | 49.1 | 65.6 | 112.5 | 1.2 |
| 814 | Leu | 20190812 | 36 | 1.0 | 140.8 | 42.9 | 67.0 | 120.0 | 1.6 |
| 815 | Leu | 20190812 | 28 | 2.0 | 162.0 | 34.4 | 50.8 | 83.7  | 1.1 |
| 830 | Leu | 20190709 | 22 | 2.5 | 180.6 | 33.8 | 65.2 | /     | 1.3 |
| 831 | Leu | 20190709 | 23 | 3.0 | 228.5 | 42.2 | 68.6 | 120.5 | 1.1 |
| 858 | Leu | 20190719 | 32 | 1.0 | 207.2 | 34.6 | 57.2 | 92.3  | 1.5 |
| 871 | Leu | 20190802 | 35 | 5.0 | 119.5 | 32.0 | 50.2 | 74.8  | 1.3 |
| 872 | Leu | 20190802 | 30 | 4.0 | 159.4 | 33.3 | 46.0 | 84.3  | 1.1 |
| 873 | Leu | 20190802 | 21 | 7.0 | 114.2 | 37.2 | 52.1 | 70.1  | 2.5 |
| 875 | Leu | 20190803 | 32 | 1.0 | 93.0  | 32.4 | 52.9 | 66.1  | 1.7 |
| 876 | Leu | 20190803 | 22 | 1.0 | 138.1 | 48.2 | 69.4 | 85.0  | 1.4 |
| 880 | Leu | 20190622 | 29 | 2.5 | 98.3  | 43.2 | 58.7 | 100.3 | 1.1 |
| 889 | Leu | 20190625 | 39 | 3.0 | 148.8 | 32.1 | 52.2 | 91.5  | 3.0 |
| 896 | Leu | 20190626 | 30 | 3.0 | 146.1 | 32.0 | 48.7 | /     | 1.2 |
| 898 | Leu | 20190627 | 24 | 1.0 | 172.7 | 50.7 | 70.7 | 106.0 | 1.7 |
| 900 | Leu | 20190627 | 26 | 5.5 | 116.9 | 32.7 | 50.4 | /     | 1.4 |
| 901 | Leu | 20190627 | 34 | 3.5 | 159.4 | 38.8 | 65.1 | /     | 1.4 |
| 904 | Leu | 20190629 | 24 | 1.0 | 140.8 | 34.9 | 52.8 | 90.3  | 1.5 |
| 906 | Leu | 20190629 | 27 | 1.0 | 124.9 | 41.3 | 56.6 | 99.7  | 1.1 |
| 909 | Leu | 20190701 | 35 | 6.0 | 193.9 | 42.4 | 65.7 | 116.0 | 1.5 |
| 915 | Leu | 20190703 | 23 | 0.5 | 475.5 | 44.1 | 79.9 | 119.7 | 1.2 |
| 919 | Leu | 20190706 | 30 | 5.0 | 188.6 | 36.6 | 62.0 | 80.5  | 1.1 |
| 922 | Leu | 20190706 | 31 | 2.0 | 289.6 | 35.4 | 70.8 | 94.7  | 1.1 |
| 935 | Leu | 20190606 | 29 | 3.5 | 162.0 | 36.1 | 54.1 | /     | 1.3 |
| 938 | Leu | 20190610 | 31 | 4.0 | 106.3 | 41.8 | 54.5 | 77.1  | 1.6 |
| 944 | Leu | 20190612 | 33 | 8.0 | 170.0 | 34.4 | 56.3 | 96.7  | 1.1 |
| 949 | Leu | 20190613 | 32 | 1.5 | 143.5 | 33.4 | 57.5 | 73.6  | 1.2 |
| 951 | Leu | 20190613 | 26 | 0.3 | 93.0  | 40.4 | 53.3 | 100.6 | 1.1 |
| 952 | Leu | 20190613 | 23 | 4.5 | 148.8 | 41.8 | 64.3 | /     | 2.5 |
| 953 | Leu | 20190613 | 40 | 1.0 | 220.5 | 33.7 | 50.6 | 72.7  | 1.4 |

|      |     |          |    |     |       |      |      |       |     |
|------|-----|----------|----|-----|-------|------|------|-------|-----|
| 958  | Leu | 20190617 | 20 | 3.0 | 215.2 | 51.4 | 71.6 | 93.3  | 1.2 |
| 964  | Leu | 20190618 | 29 | 5.5 | 159.4 | 41.6 | 54.1 | 74.0  | 1.2 |
| 966  | Leu | 20190619 | 41 | 2.5 | 255.0 | 35.5 | 53.9 | 98.0  | 1.4 |
| 967  | Leu | 20190619 | 29 | 3.0 | 260.3 | 45.9 | 72.1 | 125.7 | 1.2 |
| 984  | Leu | 20190515 | 34 | 7.0 | 148.8 | 42.9 | 62.2 | 92.4  | 1.1 |
| 990  | Leu | 20190520 | 32 | 4.5 | 124.9 | 44.6 | 72.3 | 109.3 | 1.2 |
| 1021 | Leu | 20190531 | 27 | 1.5 | 106.3 | 32.5 | 50.0 | 93.6  | 1.2 |
| 1024 | Leu | 20190601 | 33 | 2.0 | 191.3 | 34.7 | 55.5 | 94.0  | 1.3 |
| 1043 | Leu | 20190506 | 27 | 2.0 | 180.6 | 32.4 | 61.8 | 83.0  | 1.4 |
| 1046 | Leu | 20190507 | 27 | 1.0 | 180.6 | 38.2 | 60.3 | 119.4 | 1.5 |
| 1064 | Leu | 20190511 | 32 | 4.0 | 116.9 | 36.4 | 54.6 | 97.6  | 1.4 |
| 1074 | Leu | 20190513 | 29 | 5.5 | 175.3 | 50.0 | 71.2 | 91.4  | 1.8 |
| 1083 | Leu | 20190415 | 32 | 1.5 | 172.7 | 43.1 | 57.7 | 91.5  | 1.3 |
| 1084 | Leu | 20190415 | 32 | 4.0 | 260.3 | 40.8 | 70.4 | 105.2 | 1.9 |
| 1093 | Leu | 20190417 | 36 | 0.5 | 223.1 | 40.5 | 64.7 | 92.6  | 1.3 |
| 1097 | Leu | 20190418 | 29 | 5.0 | 223.1 | 39.3 | 70.3 | 109.2 | 1.1 |
| 1116 | Leu | 20190424 | 33 | 5.0 | 178.0 | 41.8 | 55.2 | 101.3 | 1.5 |
| 1119 | Leu | 20190424 | 28 | 1.5 | 159.4 | 37.9 | 51.2 | 84.9  | 2.5 |
| 1121 | Leu | 20190424 | 40 | 3.0 | 255.0 | 41.6 | 71.8 | 125.0 | 1.1 |
| 1131 | Leu | 20190330 | 30 | 3.0 | 209.9 | 46.8 | 68.3 | 132.0 | 1.1 |
| 1135 | Leu | 20190401 | 29 | 2.5 | 170.0 | 43.7 | 64.0 | 120.0 | 1.1 |
| 1146 | Leu | 20190402 | 37 | 1.5 | 225.8 | 37.6 | 56.4 | 105.6 | 1.1 |
| 1156 | Leu | 20190409 | 28 | 1.5 | 143.5 | 45.6 | 58.2 | 113.7 | 1.1 |
| 1157 | Leu | 20190409 | 23 | 1.0 | 183.3 | 43.5 | 63.8 | 118.9 | 1.3 |
| 1160 | Leu | 20190410 | 33 | 2.5 | 100.9 | 34.2 | 50.0 | 97.4  | 1.2 |
| 1167 | Leu | 20190411 | 31 | 4.5 | 178.0 | 44.8 | 56.0 | 95.6  | 1.1 |
| 1170 | Leu | 20190412 | 32 | 2.5 | 204.6 | 32.5 | 66.3 | 103.6 | 1.1 |
| 1171 | Leu | 20190413 | 29 | 2.0 | 183.3 | 39.4 | 54.1 | 79.2  | 1.3 |
| 1173 | Leu | 20190413 | 33 | 4.5 | 170.0 | 36.0 | 53.6 | 90.8  | 1.4 |
| 1181 | Leu | 20190319 | 32 | 4.0 | 122.2 | 37.0 | 56.3 | 99.0  | 1.5 |
| 1183 | Leu | 20190319 | 31 | 3.0 | 233.8 | 52.3 | 82.2 | 126.8 | 1.1 |
| 1192 | Leu | 20190320 | 31 | 4.0 | 260.3 | 57.2 | 83.7 | 118.4 | 1.2 |
| 1193 | Leu | 20190320 | 28 | 3.5 | 106.3 | 44.5 | 60.5 | 83.1  | 1.1 |
| 1206 | Leu | 20190325 | 26 | 2.0 | 260.3 | 46.9 | 71.4 | 111.7 | 1.3 |
| 1230 | Leu | 20190222 | 27 | 0.2 | 186.0 | 32.9 | 61.1 | 105.7 | 1.6 |
| 1238 | Leu | 20190223 | 31 | 1.0 | 220.5 | 32.6 | 57.5 | 106.9 | 4.8 |
| 1256 | Leu | 20190228 | 35 | 1.0 | 180.6 | 37.7 | 75.9 | 105.7 | 1.1 |
| 1257 | Leu | 20190228 | 34 | 1.5 | 116.9 | 34.1 | 52.3 | 88.2  | 1.1 |
| 1261 | Leu | 20190302 | 30 | 1.0 | 212.5 | 32.8 | 58.8 | 95.7  | 1.3 |
| 1263 | Leu | 20190302 | 36 | 4.0 | 300.2 | 40.8 | 70.9 | 72.9  | 1.6 |
| 1266 | Leu | 20190304 | 25 | 4.5 | 100.9 | 36.9 | 50.1 | 83.8  | 1.4 |
| 1267 | Leu | 20190304 | 32 | 2.5 | 151.4 | 42.1 | 78.9 | 115.4 | 1.3 |
| 1270 | Leu | 20190305 | 35 | 4.5 | 159.4 | 46.7 | 75.0 | 122.4 | 1.1 |
| 1281 | Leu | 20190306 | 35 | 2.5 | 154.1 | 51.3 | 66.4 | 109.6 | 1.1 |
| 1285 | Leu | 20190308 | 29 | 1.5 | 271.0 | 37.7 | 62.7 | 118.0 | 1.1 |

|      |     |          |    |     |       |      |      |       |     |
|------|-----|----------|----|-----|-------|------|------|-------|-----|
| 1286 | Leu | 20190308 | 32 | 5.0 | 135.5 | 32.6 | 55.3 | 95.3  | 1.1 |
| 1306 | Leu | 20190313 | 28 | 0.5 | 209.9 | 54.4 | 78.5 | 122.5 | 1.1 |
| 1312 | Leu | 20190314 | 29 | 5.5 | 156.7 | 33.5 | 50.4 | 85.0  | 1.2 |
| 1316 | Leu | 20190316 | 29 | 1.5 | 172.7 | 32.3 | 55.4 | 99.1  | 1.5 |
| 1318 | Leu | 20190316 | 36 | 5.0 | 244.4 | 47.9 | 58.4 | 117.0 | 2.1 |
| 1321 | Leu | 20190326 | 36 | 2.5 | 164.7 | 35.5 | 51.6 | 89.2  | 1.1 |
| 1324 | Leu | 20190212 | 33 | 3.0 | 122.2 | 33.7 | 53.6 | 92.7  | 1.2 |
| 1325 | Leu | 20190213 | 39 | 2.5 | 114.2 | 39.1 | 63.8 | 94.4  | 1.3 |
| 1328 | Leu | 20190213 | 32 | 1.0 | 98.3  | 48.6 | 64.0 | 105.9 | 1.6 |
| 1332 | Leu | 20190214 | 30 | 2.0 | 199.2 | 48.0 | 63.6 | 100.7 | 2.2 |
| 1353 | Leu | 20190218 | 28 | 1.5 | 95.6  | 33.3 | 54.6 | 75.7  | 1.1 |
| 1376 | Leu | 20190118 | 29 | 2.0 | 130.2 | 38.7 | 53.8 | 83.5  | 1.9 |
| 1384 | Leu | 20190122 | 32 | 3.0 | 113.5 | 43.8 | 68.5 | 114.9 | 1.5 |
| 1391 | Leu | 20190123 | 28 | 6.5 | 135.5 | 45.1 | 63.4 | 117.3 | 1.4 |
| 1400 | Leu | 20190128 | 38 | 1.0 | 103.6 | 37.4 | 53.9 | 80.3  | 2.2 |
| 1410 | Leu | 20190131 | 35 | 3.0 | 100.9 | 42.1 | 56.6 | 89.3  | 1.2 |
| 1418 | Leu | 20190212 | 35 | 4.0 | 130.2 | 42.9 | 58.1 | 107.0 | 1.1 |
| 1419 | Leu | 20190212 | 24 | 1.0 | 425.0 | 58.2 | 85.7 | 103.9 | 1.2 |
| 1426 | Leu | 20190103 | 34 | 5.5 | 146.1 | 40.0 | 56.4 | 95.0  | 1.6 |
| 1433 | Leu | 20190107 | 22 | 0.5 | 138.1 | 34.6 | 52.8 | 88.0  | 1.4 |
| 1437 | Leu | 20190108 | 39 | 4.0 | 172.7 | 35.4 | 52.3 | 99.3  | 1.1 |
| 1440 | Leu | 20190108 | 29 | 5.0 | 111.6 | 33.3 | 50.0 | 79.5  | 1.6 |
| 1467 | Leu | 20190116 | 29 | 3.5 | 334.7 | 45.3 | 65.5 | 116.0 | 1.2 |
| 1474 | Leu | 20201128 | 33 | 4.0 | 289.6 | 43.1 | 74.3 | 109.9 | 1.7 |
| 1482 | Leu | 20201125 | 35 | 2.5 | 231.1 | 37.9 | 62.0 | 90.7  | 1.6 |
| 4    | Ast | 20201123 | 29 | 1.5 | 63.8  | 25.0 | 45.8 | 79.3  | 1.0 |
| 9    | Ast | 20201117 | 29 | 2.0 | 209.9 | 31.6 | 50.2 | 83.3  | 1.0 |
| 22   | Ast | 20201109 | 29 | 1.0 | 156.7 | 21.6 | 45.8 | 70.8  | 1.0 |
| 24   | Ast | 20201106 | 32 | 2.0 | 42.5  | 13.4 | 25.0 | 59.1  | 0.6 |
| 25   | Ast | 20201106 | 33 | 5.5 | 162.0 | 26.5 | 45.8 | 75.3  | 1.0 |
| 35   | Ast | 20201103 | 30 | 2.5 | 79.7  | 30.0 | 50.4 | 97.3  | 0.9 |
| 38   | Ast | 20201102 | 30 | 2.0 | 86.3  | 27.3 | 45.0 | 70.2  | 0.6 |
| 41   | Ast | 20201030 | 30 | 6.5 | 58.4  | 30.0 | 44.5 | 88.3  | 0.6 |
| 52   | Ast | 20201027 | 39 | 4.5 | 69.1  | 15.0 | 34.6 | 56.3  | 0.8 |
| 57   | Ast | 20201026 | 28 | 5.0 | 188.6 | 29.6 | 52.6 | 91.4  | 0.8 |
| 95   | Ast | 20200928 | 36 | 1.5 | 193.9 | 3.6  | 5.4  | 51.9  | 0.4 |
| 96   | Ast | 20200928 | 28 | 4.0 | 24.3  | 20.5 | 23.4 | 40.2  | 0.7 |
| 106  | Ast | 20200921 | 32 | 2.5 | 263.0 | 28.3 | 58.6 | 100.1 | 0.9 |
| 107  | Ast | 20200921 | 31 | 0.5 | 21.3  | 12.5 | 25.0 | 33.9  | 0.5 |
| 119  | Ast | 20200910 | 30 | 7.0 | 95.6  | 23.1 | 40.2 | 61.4  | 0.6 |
| 135  | Ast | 20200907 | 29 | 1.0 | 140.8 | 30.1 | 43.3 | 88.1  | 0.5 |
| 137  | Ast | 20200904 | 24 | 2.0 | 26.6  | 19.5 | 34.7 | 43.3  | 0.8 |
| 139  | Ast | 20200903 | 27 | 5.0 | 116.9 | 31.8 | 63.6 | 85.2  | 0.9 |
| 143  | Ast | 20200902 | 23 | 5.0 | 53.1  | 25.0 | 43.2 | 70.7  | 0.5 |
| 153  | Ast | 20200831 | 28 | 3.0 | 23.5  | 24.0 | 32.0 | 51.4  | 0.5 |

|     |     |          |    |     |       |      |      |       |     |
|-----|-----|----------|----|-----|-------|------|------|-------|-----|
| 180 | Ast | 20200817 | 19 | 2.5 | 201.9 | 27.6 | 43.4 | 73.2  | 1.0 |
| 184 | Ast | 20200817 | 31 | 3.0 | 28.4  | 28.0 | 37.3 | 60.5  | 0.6 |
| 188 | Ast | 20200814 | 36 | 4.5 | 21.3  | 1.5  | 5.3  | 31.6  | 0.7 |
| 190 | Ast | 20200813 | 27 | 5.0 | 178.0 | 23.9 | 53.0 | 105.4 | 0.9 |
| 198 | Ast | 20200811 | 25 | 1.0 | 45.9  | 24.8 | 40.5 | 66.2  | 0.8 |
| 230 | Ast | 20200729 | 23 | 5.0 | 45.2  | 29.8 | 45.3 | 62.2  | 0.5 |
| 251 | Ast | 20200721 | 30 | 5.5 | 106.3 | 27.5 | 51.0 | 97.3  | 0.8 |
| 253 | Ast | 20200720 | 26 | 6.0 | 135.5 | 29.4 | 51.0 | 74.1  | 0.9 |
| 261 | Ast | 20200715 | 22 | 2.0 | 61.1  | 30.5 | 53.0 | 88.6  | 0.9 |
| 285 | Ast | 20200701 | 32 | 5.0 | 124.9 | 22.7 | 46.8 | 60.0  | 0.9 |
| 286 | Ast | 20200701 | 32 | 4.0 | 68.7  | 17.4 | 35.3 | 62.9  | 0.6 |
| 303 | Ast | 20200622 | 23 | 3.0 | 178.0 | 31.3 | 61.2 | 101.4 | 0.5 |
| 342 | Ast | 20200521 | 29 | 5.0 | 66.4  | 24.0 | 48.0 | 89.0  | 0.8 |
| 356 | Ast | 20200512 | 27 | 4.0 | 220.5 | 30.1 | 50.6 | 55.9  | 1.0 |
| 358 | Ast | 20200511 | 35 | 3.0 | 71.7  | 22.2 | 33.3 | 57.1  | 0.8 |
| 366 | Ast | 20200506 | 35 | 4.0 | 18.5  | 1.5  | 9.6  | 38.2  | 0.4 |
| 378 | Ast | 20200107 | 40 | 2.0 | 71.7  | 29.6 | 42.4 | 59.1  | 0.8 |
| 382 | Ast | 20200107 | 26 | 4.0 | 23.2  | 19.1 | 31.3 | 52.4  | 0.5 |
| 387 | Ast | 20200106 | 26 | 1.5 | 170.0 | 26.9 | 49.6 | 89.2  | 0.8 |
| 401 | Ast | 20191230 | 30 | 3.0 | 50.5  | 15.5 | 35.4 | 63.1  | 0.7 |
| 411 | Ast | 20191224 | 29 | 2.0 | 215.2 | 29.6 | 56.8 | 93.3  | 0.9 |
| 418 | Ast | 20191223 | 36 | 5.0 | 50.5  | 15.8 | 31.6 | 48.1  | 0.7 |
| 425 | Ast | 20191221 | 39 | 2.5 | 148.8 | 23.2 | 46.8 | 90.1  | 0.8 |
| 434 | Ast | 20191217 | 33 | 2.0 | 18.6  | 2.5  | 9.2  | 33.1  | 1.0 |
| 445 | Ast | 20191210 | 28 | 4.0 | 111.6 | 31.0 | 48.5 | 92.7  | 1.0 |
| 448 | Ast | 20191209 | 34 | 4.0 | 85.0  | 31.3 | 45.6 | 77.2  | 0.5 |
| 463 | Ast | 20191202 | 26 | 3.0 | 29.2  | 18.6 | 30.6 | 45.0  | 1.0 |
| 471 | Ast | 20191127 | 29 | 1.5 | 108.9 | 31.7 | 61.0 | 110.6 | 0.9 |
| 475 | Ast | 20191125 | 30 | 1.0 | 106.3 | 19.2 | 45.8 | 75.9  | 0.6 |
| 489 | Ast | 20191119 | 35 | 5.0 | 148.8 | 27.4 | 46.4 | 66.0  | 0.7 |
| 492 | Ast | 20191118 | 30 | 6.5 | 63.8  | 29.2 | 45.9 | 60.7  | 0.9 |
| 499 | Ast | 20191115 | 28 | 2.5 | 21.3  | 23.3 | 28.5 | 63.8  | 0.9 |
| 500 | Ast | 20191115 | 32 | 1.5 | 164.7 | 29.2 | 50.2 | 79.3  | 0.8 |
| 501 | Ast | 20191114 | 28 | 1.0 | 98.3  | 27.0 | 43.2 | 62.3  | 0.6 |
| 526 | Ast | 20191101 | 29 | 3.5 | 74.4  | 25.0 | 45.5 | 60.4  | 0.7 |
| 577 | Ast | 20191019 | 26 | 2.0 | 77.0  | 24.1 | 43.3 | 63.1  | 0.8 |
| 578 | Ast | 20191019 | 37 | 5.0 | 45.8  | 23.2 | 34.8 | 45.5  | 0.9 |
| 586 | Ast | 20191021 | 29 | 5.5 | 148.8 | 26.8 | 55.4 | 93.1  | 1.0 |
| 608 | Ast | 20191028 | 39 | 1.5 | 45.2  | 24.1 | 35.4 | 45.2  | 0.4 |
| 616 | Ast | 20190926 | 31 | 0.5 | 90.3  | 29.4 | 48.5 | 76.1  | 0.7 |
| 631 | Ast | 20191009 | 37 | 1.0 | 61.1  | 19.3 | 43.5 | 58.1  | 0.7 |
| 635 | Ast | 20191010 | 28 | 3.5 | 37.2  | 22.6 | 29.7 | 46.3  | 0.8 |
| 646 | Ast | 20191014 | 34 | 2.0 | 167.4 | 21.5 | 42.9 | /     | 0.5 |
| 655 | Ast | 20191015 | 35 | 3.5 | 116.9 | 27.7 | 43.2 | 87.9  | 0.7 |
| 659 | Ast | 20191016 | 33 | 2.0 | 23.4  | 13.3 | 20.7 | 37.5  | 0.4 |

|      |     |          |    |     |       |      |      |       |     |
|------|-----|----------|----|-----|-------|------|------|-------|-----|
| 668  | Ast | 20190911 | 30 | 3.0 | 95.6  | 28.2 | 54.6 | 81.6  | 0.7 |
| 669  | Ast | 20190912 | 30 | 4.0 | 85.0  | 17.4 | 34.4 | 55.9  | 0.7 |
| 673  | Ast | 20190917 | 28 | 1.5 | 84.2  | 18.9 | 34.7 | 51.4  | 0.6 |
| 676  | Ast | 20190917 | 29 | 6.0 | 82.4  | 25.8 | 40.9 | 62.2  | 0.7 |
| 680  | Ast | 20190918 | 31 | 5.0 | 53.1  | 24.1 | 45.9 | 90.1  | 0.8 |
| 685  | Ast | 20190920 | 29 | 5.5 | 188.6 | 28.1 | 60.6 | /     | 0.8 |
| 689  | Ast | 20190921 | 40 | 5.0 | 71.7  | 30.5 | 40.8 | /     | 0.8 |
| 739  | Ast | 20190819 | 20 | 2.0 | 31.6  | 26.9 | 40.9 | 71.4  | 0.8 |
| 741  | Ast | 20190820 | 33 | 5.5 | 95.0  | 28.3 | 48.5 | 80.5  | 0.4 |
| 749  | Ast | 20190821 | 32 | 1.0 | 146.1 | 29.1 | 50.9 | 79.4  | 0.9 |
| 750  | Ast | 20190822 | 31 | 2.0 | 217.8 | 31.7 | 64.6 | 108.6 | 0.7 |
| 757  | Ast | 20190824 | 37 | 0.5 | 23.9  | 13.8 | 26.7 | 41.3  | 0.9 |
| 801  | Ast | 20190808 | 28 | 2.0 | 114.2 | 27.0 | 48.9 | 83.6  | 0.4 |
| 818  | Ast | 20190813 | 28 | 2.0 | 66.4  | 16.0 | 34.7 | 49.3  | 0.8 |
| 835  | Ast | 20190709 | 34 | 1.5 | 87.7  | 29.9 | 41.6 | 74.2  | 0.6 |
| 846  | Ast | 20190715 | 25 | 5.0 | 172.7 | 20.0 | 40.0 | 88.7  | 0.4 |
| 853  | Ast | 20190717 | 36 | 3.5 | 130.2 | 31.7 | 51.3 | 95.4  | 0.6 |
| 866  | Ast | 20194722 | 33 | 3.0 | 114.2 | 29.0 | 49.5 | 91.7  | 0.4 |
| 894  | Ast | 20190626 | 31 | 4.5 | 82.4  | 21.3 | 39.7 | 54.5  | 0.7 |
| 927  | Ast | 20190708 | 22 | 5.5 | 15.9  | 11.9 | 23.3 | /     | 0.9 |
| 943  | Ast | 20190611 | 36 | 1.0 | 55.8  | 24.8 | 38.1 | 60.3  | 1.0 |
| 945  | Ast | 20190612 | 37 | 1.0 | 90.3  | 3.0  | 11.8 | 55.0  | 0.4 |
| 950  | Ast | 20190613 | 30 | 4.5 | 63.8  | 5.4  | 10.3 | /     | 1.0 |
| 962  | Ast | 20190617 | 27 | 2.0 | 66.4  | 29.0 | 43.4 | 94.1  | 0.9 |
| 974  | Ast | 20190621 | 42 | 1.0 | 90.3  | 8.8  | 17.6 | 58.1  | 0.7 |
| 976  | Ast | 20190622 | 29 | 1.0 | 103.6 | 27.6 | 50.0 | 86.0  | 0.7 |
| 989  | Ast | 20190520 | 35 | 5.0 | 116.9 | 22.7 | 40.9 | 71.5  | 0.8 |
| 993  | Ast | 20190521 | 42 | 0.5 | 103.6 | 5.1  | 13.2 | 58.1  | 0.7 |
| 998  | Ast | 20190523 | 30 | 5.5 | 138.1 | 28.5 | 45.4 | 68.4  | 1.0 |
| 1000 | Ast | 20190523 | 24 | 3.0 | 50.5  | 27.3 | 42.1 | 56.8  | 0.5 |
| 1010 | Ast | 20190527 | 31 | 2.0 | 64.8  | 27.9 | 38.6 | 58.2  | 0.8 |
| 1012 | Ast | 20190529 | 33 | 5.0 | 116.9 | 29.5 | 57.2 | 99.2  | 0.7 |
| 1027 | Ast | 20190429 | 22 | 2.5 | 207.2 | 21.8 | 48.7 | /     | 1.0 |
| 1039 | Ast | 20190506 | 26 | 4.0 | 212.5 | 26.3 | 63.2 | 107.1 | 0.5 |
| 1050 | Ast | 20190508 | 25 | 0.5 | 124.9 | 29.8 | 46.5 | 91.6  | 0.5 |
| 1059 | Ast | 20190509 | 26 | 2.5 | 138.1 | 23.5 | 48.5 | 97.1  | 0.4 |
| 1063 | Ast | 20190511 | 31 | 3.0 | 85.7  | 21.7 | 40.3 | 62.7  | 0.9 |
| 1066 | Ast | 20190511 | 29 | 3.5 | 100.9 | 24.5 | 45.6 | 64.4  | 0.7 |
| 1070 | Ast | 20190513 | 32 | 4.0 | 135.5 | 28.1 | 45.1 | 72.5  | 0.7 |
| 1077 | Ast | 20190415 | 22 | 1.0 | 212.5 | 30.6 | 56.9 | 88.2  | 0.9 |
| 1104 | Ast | 20190420 | 31 | 5.0 | 116.9 | 25.4 | 47.0 | 73.5  | 1.0 |
| 1105 | Ast | 20190420 | 32 | 5.5 | 116.9 | 25.0 | 56.8 | 97.0  | 0.8 |
| 1122 | Ast | 20190425 | 31 | 2.5 | 252.4 | 28.3 | 49.7 | 89.1  | 0.5 |
| 1141 | Ast | 20190401 | 32 | 4.0 | 85.0  | 31.2 | 46.8 | 95.7  | 0.9 |
| 1145 | Ast | 20190402 | 37 | 2.5 | 58.4  | 31.5 | 45.5 | 93.3  | 0.5 |

|      |     |          |    |     |       |      |      |       |     |
|------|-----|----------|----|-----|-------|------|------|-------|-----|
| 1169 | Ast | 20190413 | 28 | 4.0 | 108.9 | 23.5 | 39.4 | /     | 0.8 |
| 1177 | Ast | 20190318 | 30 | 6.5 | 15.1  | 7.0  | 12.3 | 53.7  | 1.0 |
| 1182 | Ast | 20190319 | 24 | 3.0 | 25.2  | 30.7 | 41.6 | 94.7  | 0.4 |
| 1187 | Ast | 20190320 | 20 | 1.8 | 140.6 | 28.3 | 49.1 | 90.6  | 1.0 |
| 1195 | Ast | 20190321 | 26 | 2.5 | 90.3  | 24.5 | 45.1 | 78.3  | 0.6 |
| 1196 | Ast | 20190322 | 30 | 5.0 | 61.1  | 18.8 | 38.6 | 50.1  | 0.9 |
| 1203 | Ast | 20190325 | 28 | 0.2 | 209.9 | 25.3 | 44.3 | 84.5  | 0.8 |
| 1207 | Ast | 20190326 | 35 | 2.5 | 305.5 | 30.4 | 60.0 | 97.5  | 0.7 |
| 1231 | Ast | 20190222 | 30 | 4.5 | 191.3 | 28.8 | 54.1 | 99.0  | 0.7 |
| 1235 | Ast | 20190223 | 28 | 4.0 | 100.9 | 26.3 | 51.7 | 100.9 | 0.4 |
| 1246 | Ast | 20190226 | 28 | 2.5 | 193.9 | 31.9 | 60.2 | 115.3 | 1.0 |
| 1247 | Ast | 20190226 | 28 | 2.0 | 140.8 | 30.2 | 61.2 | 109.7 | 0.6 |
| 1269 | Ast | 20190305 | 18 | 0.5 | 16.9  | 29.0 | 39.8 | 68.5  | 0.3 |
| 1272 | Ast | 20190305 | 28 | 3.0 | 116.9 | 30.5 | 54.6 | 96.3  | 0.3 |
| 1273 | Ast | 20190305 | 30 | 3.5 | 148.8 | 23.6 | 46.8 | 59.9  | 1.0 |
| 1288 | Ast | 20190309 | 30 | 4.0 | 231.1 | 29.8 | 52.8 | 91.6  | 0.9 |
| 1294 | Ast | 20190311 | 31 | 3.0 | 236.4 | 29.3 | 61.9 | 90.4  | 0.8 |
| 1297 | Ast | 20190311 | 33 | 6.0 | 52.4  | 18.1 | 37.5 | 55.0  | 1.0 |
| 1299 | Ast | 20190311 | 21 | 1.5 | 82.4  | 22.6 | 45.2 | 100.7 | 0.9 |
| 1305 | Ast | 20190313 | 31 | 2.0 | 93.0  | 20.0 | 38.6 | 63.7  | 0.5 |
| 1345 | Ast | 20190216 | 41 | 0.2 | 23.0  | 23.6 | 30.8 | /     | 0.8 |
| 1346 | Ast | 20190216 | 32 | 5.5 | 108.9 | 21.9 | 43.9 | 62.3  | 1.0 |
| 1354 | Ast | 20190218 | 28 | 1.0 | 135.5 | 29.4 | 58.8 | 94.6  | 0.8 |
| 1357 | Ast | 20190218 | 26 | 2.0 | 116.9 | 27.3 | 43.5 | 56.2  | 1.0 |
| 1359 | Ast | 20190219 | 32 | 2.0 | 93.0  | 17.8 | 35.2 | 72.5  | 0.0 |
| 1361 | Ast | 20190219 | 28 | 2.5 | 103.6 | 25.6 | 53.2 | 97.4  | 0.5 |
| 1366 | Ast | 20190220 | 20 | 3.0 | 77.4  | 27.5 | 41.2 | 118.3 | 0.4 |
| 1374 | Ast | 20190117 | 41 | 1.5 | 61.1  | 19.8 | 43.0 | /     | 0.8 |
| 1389 | Ast | 20190123 | 28 | 3.0 | 170.0 | 31.3 | 51.6 | 95.9  | 0.6 |
| 1398 | Ast | 20190128 | 29 | 1.5 | 164.7 | 30.7 | 51.7 | /     | 1.0 |
| 1399 | Ast | 20190128 | 37 | 1.0 | 34.9  | 21.6 | 42.1 | /     | 0.8 |
| 1406 | Ast | 20190130 | 25 | 5.5 | 127.5 | 25.9 | 53.7 | 100.7 | 1.0 |
| 1429 | Ast | 20190107 | 26 | 4.5 | 138.1 | 28.9 | 45.9 | 107.0 | 0.9 |
| 1435 | Ast | 20190108 | 39 | 1.0 | 180.6 | 23.7 | 49.1 | 70.1  | 0.7 |
| 1453 | Ast | 20190112 | 28 | 2.0 | 133.4 | 31.9 | 53.8 | 106.3 | 0.7 |
| 1477 | Ast | 20201127 | 37 | 0.5 | 267.0 | 31.8 | 61.7 | 94.8  | 0.9 |
| 1480 | Ast | 20201125 | 31 | 3.0 | 146.1 | 6.9  | 20.1 | 60.2  | 0.8 |
| 1486 | Ast | 20201124 | 32 | 5.5 | 95.6  | 19.4 | 36.1 | 61.3  | 0.6 |
| 140  | Ast | 20200902 | 32 | 5.5 | 114.2 | 32.5 | 48.3 | 69.5  | 1.0 |
| 116  | Ast | 20200914 | 31 | 1.5 | 71.7  | 35.6 | 48.1 | 73.2  | 1.0 |
| 449  | Ast | 20191209 | 27 | 1.0 | 114.2 | 32.5 | 48.8 | 71.4  | 0.8 |
| 1091 | Ast | 20190416 | 25 | 2.5 | 64.0  | 36.6 | 48.3 | 90.3  | 0.4 |
| 1268 | Ast | 20190305 | 37 | 2.0 | 140.8 | 37.8 | 48.6 | 92.0  | 0.8 |
| 84   | Ast | 20201010 | 32 | 5.5 | 164.7 | 32.3 | 48.4 | 84.1  | 0.7 |
| 1044 | Ast | 20190506 | 28 | 2.5 | 79.7  | 33.3 | 45.0 | 69.9  | 0.8 |



|      |     |          |    |     |       |      |      |       |     |
|------|-----|----------|----|-----|-------|------|------|-------|-----|
| 1045 | Ast | 20190507 | 38 | 3.0 | 74.4  | 32.1 | 42.8 | 72.7  | 0.6 |
| 2    | LA  | 20201123 | 27 | 3.5 | 84.7  | 28.6 | 55.6 | 92.1  | 1.7 |
| 3    | LA  | 20201123 | 28 | 1.5 | 66.4  | 16.5 | 40.0 | 60.8  | 1.4 |
| 8    | LA  | 20201118 | 24 | 4.0 | 100.6 | 28.0 | 63.1 | 90.7  | 1.2 |
| 13   | LA  | 20201113 | 30 | 2.0 | 37.2  | 4.0  | 8.4  | 43.9  | 1.5 |
| 19   | LA  | 20201110 | 31 | 4.5 | 100.5 | 27.0 | 50.7 | 83.7  | 1.1 |
| 23   | LA  | 20201109 | 24 | 3.0 | 90.3  | 9.6  | 31.0 | 43.6  | 1.4 |
| 26   | LA  | 20201104 | 24 | 3.5 | 23.9  | 11.1 | 22.2 | 43.3  | 1.1 |
| 28   | LA  | 20201104 | 29 | 4.0 | 26.6  | 10.9 | 15.2 | 40.9  | 1.1 |
| 30   | LA  | 20201104 | 24 | 6.5 | 90.3  | 23.5 | 49.6 | 71.3  | 1.8 |
| 32   | LA  | 20201103 | 34 | 1.0 | 132.8 | 18.0 | 42.0 | 61.6  | 1.1 |
| 36   | LA  | 20201102 | 22 | 2.0 | 75.0  | 27.3 | 54.6 | 107.4 | 1.1 |
| 39   | LA  | 20201102 | 31 | 1.0 | 105.9 | 27.9 | 49.4 | 79.0  | 1.2 |
| 42   | LA  | 20201030 | 23 | 5.0 | 199.2 | 30.7 | 49.7 | 70.6  | 1.1 |
| 44   | LA  | 20201029 | 31 | 1.0 | 85.0  | 29.2 | 56.8 | 57.8  | 1.3 |
| 45   | LA  | 20201029 | 31 | 0.5 | 82.4  | 27.1 | 40.7 | 86.2  | 1.1 |
| 48   | LA  | 20201027 | 35 | 3.0 | 106.4 | 17.5 | 35.0 | 49.0  | 1.5 |
| 49   | LA  | 20201027 | 29 | 2.5 | 271.0 | 16.5 | 48.6 | 69.9  | 1.2 |
| 53   | LA  | 20201027 | 31 | 3.5 | 135.5 | 27.4 | 45.0 | 72.3  | 1.1 |
| 55   | LA  | 20201026 | 28 | 0.5 | 167.4 | 30.1 | 49.1 | 95.6  | 1.6 |
| 60   | LA  | 20201026 | 28 | 4.0 | 193.9 | 27.4 | 52.1 | 89.5  | 1.4 |
| 62   | LA  | 20201023 | 30 | 2.0 | 123.3 | 31.5 | 50.9 | 88.0  | 1.2 |
| 63   | LA  | 20201023 | 28 | 1.0 | 140.8 | 14.1 | 30.5 | 42.6  | 1.1 |
| 66   | LA  | 20201019 | 28 | 6.5 | 95.0  | 26.6 | 47.8 | 69.1  | 1.3 |
| 77   | LA  | 20201014 | 27 | 0.5 | 18.6  | 13.8 | 28.6 | 44.9  | 1.5 |
| 78   | LA  | 20201013 | 24 | 3.0 | 135.5 | 19.6 | 41.2 | 52.0  | 1.3 |
| 80   | LA  | 20201013 | 36 | 1.0 | 67.0  | 19.9 | 39.7 | 41.1  | 1.5 |
| 83   | LA  | 20201012 | 31 | 0.3 | 45.2  | 0.3  | 4.5  | 39.5  | 1.3 |
| 88   | LA  | 20200930 | 30 | 2.0 | 106.3 | 27.5 | 45.0 | 60.7  | 1.5 |
| 94   | LA  | 20200928 | 35 | 1.5 | 90.8  | 24.6 | 48.3 | 69.9  | 1.8 |
| 98   | LA  | 20200925 | 29 | 2.0 | 39.3  | 3.4  | 5.5  | 43.9  | 1.5 |
| 100  | LA  | 20200924 | 25 | 3.5 | 82.4  | 29.0 | 48.4 | 85.1  | 1.2 |
| 104  | LA  | 20200922 | 26 | 1.0 | 111.6 | 23.8 | 45.2 | 68.0  | 1.1 |
| 105  | LA  | 20200922 | 34 | 5.5 | 26.6  | 17.7 | 28.5 | 42.5  | 1.3 |
| 111  | LA  | 20200916 | 22 | 2.5 | 124.9 | 29.8 | 46.8 | 71.9  | 1.3 |
| 113  | LA  | 20200915 | 27 | 1.5 | 39.8  | 13.3 | 25.7 | 43.3  | 1.7 |
| 122  | LA  | 20200910 | 24 | 0.5 | 191.3 | 30.5 | 60.4 | 85.5  | 1.2 |
| 130  | LA  | 20200908 | 30 | 2.5 | 100.9 | 31.6 | 48.7 | 69.3  | 1.1 |
| 141  | LA  | 20200902 | 21 | 5.5 | 87.3  | 30.9 | 43.8 | 91.6  | 1.2 |
| 142  | LA  | 20200902 | 23 | 5.0 | 87.7  | 16.0 | 39.4 | 56.7  | 1.2 |
| 145  | LA  | 20200901 | 27 | 2.0 | 119.5 | 19.6 | 44.9 | 70.1  | 1.3 |
| 151  | LA  | 20200831 | 36 | 1.0 | 34.3  | 19.2 | 34.0 | 44.7  | 1.2 |
| 152  | LA  | 20200831 | 23 | 3.0 | 189.3 | 23.5 | 48.0 | 68.2  | 1.1 |
| 154  | LA  | 20200828 | 22 | 4.5 | 85.0  | 25.0 | 46.9 | 69.9  | 1.4 |
| 155  | LA  | 20200828 | 30 | 4.0 | 71.7  | 20.6 | 40.8 | 57.3  | 1.9 |

|     |    |          |    |     |       |      |      |      |     |
|-----|----|----------|----|-----|-------|------|------|------|-----|
| 158 | LA | 20200826 | 30 | 3.0 | 85.4  | 21.7 | 40.4 | 53.6 | 1.9 |
| 165 | LA | 20200824 | 30 | 3.0 | 167.4 | 28.6 | 56.4 | 94.4 | 1.5 |
| 177 | LA | 20200818 | 30 | 5.0 | 186.0 | 31.9 | 54.3 | 81.6 | 1.2 |
| 183 | LA | 20200817 | 32 | 1.0 | 33.7  | 23.7 | 39.5 | 57.8 | 1.5 |
| 194 | LA | 20200812 | 30 | 4.0 | 130.2 | 6.1  | 12.2 | 62.5 | 1.1 |
| 200 | LA | 20200810 | 30 | 2.0 | 77.0  | 20.6 | 44.0 | 59.1 | 1.5 |
| 201 | LA | 20200810 | 28 | 4.0 | 74.4  | 21.4 | 47.3 | 70.8 | 1.2 |
| 202 | LA | 20200810 | 30 | 4.0 | 58.4  | 24.5 | 40.9 | 63.0 | 1.5 |
| 203 | LA | 20200810 | 34 | 5.0 | 48.3  | 19.3 | 30.2 | 52.5 | 1.8 |
| 204 | LA | 20200810 | 29 | 6.0 | 39.8  | 4.3  | 10.7 | 40.9 | 2.6 |
| 205 | LA | 20200807 | 31 | 2.5 | 87.7  | 24.3 | 48.2 | 71.5 | 2.2 |
| 206 | LA | 20200804 | 21 | 1.5 | 95.6  | 30.5 | 58.3 | 92.8 | 1.4 |
| 207 | LA | 20200804 | 23 | 5.0 | 90.3  | 29.4 | 48.5 | 83.3 | 1.6 |
| 210 | LA | 20200804 | 28 | 1.0 | 130.2 | 24.5 | 50.6 | 88.6 | 1.2 |
| 216 | LA | 20200803 | 32 | 2.5 | 63.8  | 30.6 | 45.9 | 74.8 | 1.3 |
| 217 | LA | 20200803 | 34 | 5.0 | 119.5 | 22.3 | 47.2 | 61.2 | 3.6 |
| 219 | LA | 20200803 | 27 | 0.5 | 58.4  | 22.7 | 35.0 | 49.4 | 1.3 |
| 229 | LA | 20200729 | 32 | 5.5 | 42.5  | 25.9 | 43.8 | 63.0 | 1.1 |
| 233 | LA | 20200728 | 23 | 4.0 | 23.5  | 4.3  | 9.5  | 32.7 | 1.6 |
| 235 | LA | 20200728 | 28 | 0.5 | 55.8  | 8.1  | 10.5 | 48.3 | 1.5 |
| 243 | LA | 20200723 | 25 | 1.0 | 180.6 | 17.7 | 41.2 | 64.2 | 1.4 |
| 244 | LA | 20200723 | 30 | 4.0 | 122.2 | 28.2 | 51.2 | 69.0 | 1.6 |
| 246 | LA | 20200723 | 36 | 4.0 | 63.8  | 20.9 | 33.4 | 60.7 | 1.4 |
| 247 | LA | 20200722 | 25 | 2.0 | 90.3  | 29.4 | 45.1 | 83.5 | 1.3 |
| 249 | LA | 20200721 | 30 | 1.0 | 180.6 | 28.4 | 55.8 | 90.5 | 1.2 |
| 252 | LA | 20200721 | 36 | 4.5 | 29.2  | 25.4 | 40.7 | 54.0 | 1.3 |
| 254 | LA | 20200720 | 37 | 6.0 | 100.9 | 21.1 | 39.5 | 61.0 | 1.1 |
| 260 | LA | 20200715 | 25 | 2.5 | 45.2  | 22.3 | 34.9 | 56.0 | 1.5 |
| 265 | LA | 20200715 | 29 | 1.0 | 82.4  | 17.5 | 38.7 | 50.5 | 2.8 |
| 266 | LA | 20200710 | 28 | 3.0 | 87.7  | 29.1 | 55.5 | 61.2 | 1.3 |
| 267 | LA | 20200710 | 30 | 2.0 | 34.5  | 25.4 | 40.3 | 60.1 | 1.4 |
| 272 | LA | 20200707 | 28 | 0.5 | 95.6  | 19.5 | 40.3 | 53.3 | 1.8 |
| 276 | LA | 20200706 | 32 | 3.0 | 31.9  | 21.4 | 38.9 | 60.9 | 1.4 |
| 288 | LA | 20200630 | 27 | 4.0 | 85.4  | 24.0 | 40.4 | 49.2 | 1.7 |
| 289 | LA | 20200630 | 28 | 0.5 | 87.7  | 18.2 | 37.7 | 45.0 | 1.4 |
| 291 | LA | 20200629 | 28 | 1.0 | 108.9 | 29.3 | 51.7 | 82.6 | 1.5 |
| 292 | LA | 20200629 | 34 | 4.0 | 71.7  | 10.2 | 21.3 | 39.7 | 4.8 |
| 293 | LA | 20200629 | 28 | 2.0 | 310.8 | 29.5 | 59.0 | 93.3 | 1.8 |
| 295 | LA | 20200628 | 29 | 5.5 | 108.9 | 9.8  | 14.7 | 40.1 | 2.3 |
| 297 | LA | 20200623 | 29 | 2.0 | 111.6 | 26.2 | 42.9 | 71.6 | 1.3 |
| 298 | LA | 20200623 | 29 | 1.0 | 130.2 | 24.5 | 46.9 | 78.1 | 1.5 |
| 300 | LA | 20200623 | 27 | 4.0 | 196.6 | 31.1 | 54.5 | 95.0 | 1.3 |
| 308 | LA | 20200617 | 31 | 1.0 | 170.0 | 30.8 | 48.4 | 69.9 | 1.2 |
| 310 | LA | 20200615 | 35 | 1.0 | 37.2  | 7.2  | 14.8 | 41.7 | 2.6 |
| 312 | LA | 20200615 | 34 | 4.0 | 85.0  | 12.0 | 34.3 | 60.0 | 2.4 |

|     |    |          |    |     |       |      |      |      |     |
|-----|----|----------|----|-----|-------|------|------|------|-----|
| 314 | LA | 20200610 | 20 | 1.0 | 93.0  | 29.5 | 45.7 | 77.0 | 1.4 |
| 316 | LA | 20200610 | 24 | 1.5 | 130.2 | 30.6 | 50.2 | 90.2 | 1.5 |
| 317 | LA | 20200609 | 38 | 4.0 | 130.2 | 0.8  | 4.1  | 50.6 | 1.4 |
| 318 | LA | 20200609 | 34 | 4.5 | 138.1 | 27.0 | 48.5 | 79.9 | 1.4 |
| 322 | LA | 20200608 | 19 | 5.0 | 34.5  | 20.3 | 32.2 | 66.8 | 1.6 |
| 325 | LA | 20200603 | 40 | 2.5 | 231.1 | 27.5 | 49.2 | 77.0 | 2.8 |
| 328 | LA | 20200602 | 27 | 1.0 | 74.4  | 21.4 | 33.9 | 51.6 | 1.4 |
| 331 | LA | 20200601 | 28 | 2.0 | 111.6 | 28.5 | 42.8 | 70.9 | 1.1 |
| 332 | LA | 20200601 | 30 | 2.0 | 79.7  | 26.3 | 48.0 | 80.2 | 1.4 |
| 337 | LA | 20200527 | 28 | 5.0 | 26.2  | 5.8  | 10.1 | 60.1 | 1.7 |
| 344 | LA | 20200520 | 34 | 5.0 | 58.4  | 18.2 | 38.1 | 60.6 | 2.5 |
| 350 | LA | 20200514 | 31 | 2.0 | 58.4  | 26.8 | 43.6 | 40.9 | 1.7 |
| 351 | LA | 20200514 | 31 | 3.5 | 42.5  | 7.7  | 20.7 | 36.1 | 2.7 |
| 352 | LA | 20200513 | 29 | 1.5 | 135.5 | 21.5 | 43.1 | 50.3 | 1.9 |
| 353 | LA | 20200513 | 35 | 1.5 | 71.7  | 29.6 | 41.2 | 51.9 | 1.4 |
| 355 | LA | 20200513 | 25 | 5.5 | 79.7  | 20.0 | 40.0 | 68.7 | 1.4 |
| 359 | LA | 20200511 | 29 | 2.5 | 77.0  | 29.1 | 48.3 | 95.8 | 1.5 |
| 362 | LA | 20200507 | 33 | 5.0 | 130.2 | 20.8 | 40.8 | 59.4 | 1.8 |
| 364 | LA | 20200507 | 29 | 1.0 | 100.9 | 31.6 | 47.4 | 73.0 | 1.2 |
| 365 | LA | 20200506 | 32 | 3.5 | 82.4  | 11.3 | 30.7 | 47.5 | 1.1 |
| 367 | LA | 20200430 | 30 | 2.0 | 106.3 | 31.1 | 49.0 | 53.9 | 1.3 |
| 371 | LA | 20200109 | 31 | 3.0 | 47.8  | 22.3 | 33.4 | 53.7 | 1.1 |
| 380 | LA | 20200107 | 38 | 3.0 | 159.4 | 29.6 | 55.4 | 85.3 | 1.1 |
| 381 | LA | 20200107 | 36 | 0.2 | 63.8  | 16.6 | 30.5 | 43.0 | 1.1 |
| 383 | LA | 20200107 | 30 | 3.0 | 39.8  | 20.0 | 39.0 | 55.6 | 1.3 |
| 386 | LA | 20200106 | 31 | 5.0 | 47.8  | 11.2 | 23.7 | 34.0 | 2.8 |
| 389 | LA | 20200106 | 30 | 2.0 | 116.9 | 26.8 | 50.4 | 97.6 | 1.1 |
| 390 | LA | 20200103 | 30 | 2.0 | 50.5  | 9.5  | 30.5 | 43.8 | 4.6 |
| 396 | LA | 20200102 | 29 | 4.5 | 100.9 | 26.3 | 42.1 | 71.7 | 1.3 |
| 404 | LA | 20191228 | 27 | 4.0 | 58.4  | 26.3 | 40.4 | 51.1 | 1.3 |
| 405 | LA | 20191228 | 32 | 1.0 | 100.9 | 28.9 | 42.1 | 54.8 | 3.1 |
| 406 | LA | 20191228 | 30 | 4.0 | 124.9 | 29.7 | 44.6 | 70.5 | 2.2 |
| 407 | LA | 20191227 | 30 | 4.0 | 77.0  | 20.7 | 41.4 | 59.7 | 1.8 |
| 408 | LA | 20191227 | 30 | 5.0 | 146.1 | 26.3 | 49.0 | 62.9 | 3.4 |
| 409 | LA | 20191227 | 28 | 5.0 | 116.9 | 29.6 | 52.3 | 93.0 | 1.1 |
| 410 | LA | 20191227 | 38 | 0.5 | 37.2  | 14.3 | 28.6 | 54.6 | 1.2 |
| 412 | LA | 20191224 | 27 | 4.5 | 69.1  | 19.2 | 35.1 | 50.4 | 1.1 |
| 413 | LA | 20191224 | 30 | 1.0 | 175.3 | 21.3 | 48.5 | 71.7 | 1.2 |
| 415 | LA | 20191223 | 28 | 4.0 | 148.8 | 27.7 | 50.0 | 72.6 | 1.5 |
| 416 | LA | 20191223 | 28 | 1.0 | 108.9 | 27.3 | 45.3 | 67.8 | 1.3 |
| 417 | LA | 20200429 | 29 | 5.5 | 284.2 | 28.0 | 52.3 | 90.8 | 1.1 |
| 436 | LA | 20191216 | 28 | 2.5 | 27.6  | 1.4  | 3.7  | 25.2 | 1.1 |
| 437 | LA | 20191216 | 31 | 3.0 | 79.7  | 22.4 | 43.4 | 69.4 | 1.8 |
| 450 | LA | 20191209 | 28 | 6.0 | 247.1 | 31.2 | 54.8 | 88.0 | 1.1 |
| 459 | LA | 20191204 | 31 | 4.0 | 71.7  | 12.6 | 28.2 | 35.9 | 2.2 |

|     |    |          |    |     |       |      |      |      |     |
|-----|----|----------|----|-----|-------|------|------|------|-----|
| 465 | LA | 20191202 | 21 | 0.5 | 175.3 | 18.1 | 42.3 | 80.4 | 1.3 |
| 472 | LA | 20191126 | 41 | 3.0 | 103.6 | 21.8 | 50.4 | 68.8 | 1.4 |
| 474 | LA | 20191126 | 30 | 1.0 | 183.3 | 23.6 | 47.0 | 71.7 | 1.2 |
| 477 | LA | 20191125 | 32 | 1.0 | 106.3 | 25.5 | 45.5 | 57.5 | 3.6 |
| 478 | LA | 20191123 | 41 | 5.5 | 98.3  | 23.0 | 40.6 | 64.0 | 2.7 |
| 482 | LA | 20191122 | 29 | 1.5 | 29.6  | 17.0 | 37.3 | 61.8 | 1.1 |
| 483 | LA | 20191122 | 39 | 4.0 | 105.1 | 30.3 | 48.0 | 69.3 | 1.1 |
| 487 | LA | 20191120 | 31 | 2.0 | 116.9 | 29.7 | 50.5 | 90.5 | 1.1 |
| 488 | LA | 20191120 | 29 | 2.5 | 69.1  | 22.2 | 40.0 | 56.2 | 1.4 |
| 490 | LA | 20191119 | 31 | 1.0 | 66.4  | 20.0 | 40.0 | 47.2 | 1.8 |
| 495 | LA | 20191118 | 27 | 4.5 | 50.5  | 20.1 | 40.7 | 59.4 | 1.1 |
| 497 | LA | 20191116 | 29 | 0.5 | 156.7 | 30.5 | 54.2 | 99.4 | 1.3 |
| 498 | LA | 20191116 | 32 | 6.0 | 34.5  | 16.6 | 31.1 | 60.5 | 1.4 |
| 503 | LA | 20191113 | 24 | 3.0 | 90.3  | 23.6 | 44.2 | 60.3 | 1.6 |
| 506 | LA | 20191113 | 28 | 0.4 | 241.7 | 31.9 | 66.1 | 98.0 | 1.5 |
| 509 | LA | 20191112 | 33 | 1.0 | 95.3  | 19.7 | 40.7 | 60.5 | 1.3 |
| 511 | LA | 20201130 | 25 | 1.0 | 127.5 | 25.0 | 46.3 | 60.1 | 2.9 |
| 513 | LA | 20191029 | 26 | 3.5 | 20.8  | 20.5 | 33.7 | 46.4 | 1.2 |
| 515 | LA | 20191029 | 32 | 4.0 | 45.2  | 17.7 | 35.3 | 41.9 | 2.1 |
| 517 | LA | 20191030 | 21 | 0.5 | 122.2 | 21.8 | 40.1 | 63.3 | 1.9 |
| 520 | LA | 20191030 | 36 | 2.5 | 66.4  | 28.5 | 43.0 | 55.8 | 1.3 |
| 522 | LA | 20191031 | 30 | 2.5 | 183.3 | 26.0 | 45.3 | 67.0 | 1.3 |
| 523 | LA | 20191031 | 30 | 3.5 | 119.5 | 19.7 | 33.9 | 55.2 | 1.6 |
| 525 | LA | 20191031 | 31 | 3.0 | 74.4  | 17.9 | 30.4 | 39.8 | 2.3 |
| 530 | LA | 20191102 | 26 | 1.0 | 64.3  | 14.2 | 24.8 | 45.6 | 1.2 |
| 531 | LA | 20191102 | 29 | 7.0 | 103.6 | 26.1 | 53.9 | 78.4 | 1.6 |
| 533 | LA | 20191102 | 37 | 1.0 | 108.9 | 19.5 | 26.8 | 49.3 | 1.1 |
| 537 | LA | 20191104 | 21 | 1.0 | 95.6  | 30.5 | 49.5 | 67.0 | 1.9 |
| 539 | LA | 20191104 | 31 | 1.0 | 159.4 | 30.0 | 50.0 | 70.9 | 1.3 |
| 540 | LA | 20191104 | 36 | 2.0 | 98.3  | 27.1 | 40.6 | 55.6 | 2.3 |
| 545 | LA | 20191106 | 38 | 1.5 | 175.3 | 26.3 | 49.3 | 72.3 | 1.1 |
| 550 | LA | 20191107 | 41 | 2.0 | 53.1  | 14.2 | 25.0 | 42.0 | 1.9 |
| 555 | LA | 20191108 | 26 | 3.0 | 116.9 | 29.5 | 43.1 | 68.4 | 1.3 |
| 559 | LA | 20191109 | 31 | 3.5 | 111.6 | 22.9 | 44.8 | 59.2 | 1.8 |
| 562 | LA | 20191016 | 31 | 4.0 | 74.4  | 17.9 | 40.5 | 46.7 | 1.3 |
| 566 | LA | 20191016 | 36 | 3.5 | 79.7  | 25.7 | 43.3 | 52.8 | 1.7 |
| 568 | LA | 20191016 | 29 | 2.0 | 36.2  | 1.4  | 4.6  | 32.2 | 1.4 |
| 571 | LA | 20191017 | 28 | 4.0 | 132.8 | 17.0 | 38.0 | 45.7 | 3.1 |
| 581 | LA | 20191019 | 30 | 3.5 | 263.0 | 27.3 | 54.6 | 78.0 | 1.5 |
| 583 | LA | 20191021 | 30 | 5.5 | 61.1  | 18.6 | 29.5 | 44.2 | 1.7 |
| 584 | LA | 20191021 | 30 | 5.0 | 29.2  | 23.4 | 31.5 | 51.2 | 1.1 |
| 585 | LA | 20191021 | 28 | 3.5 | 103.6 | 28.2 | 46.1 | 58.9 | 1.5 |
| 589 | LA | 20191021 | 30 | 6.0 | 70.4  | 31.1 | 46.7 | 61.5 | 1.3 |
| 591 | LA | 20191022 | 36 | 4.0 | 31.9  | 14.4 | 24.9 | 46.1 | 1.3 |
| 592 | LA | 20191022 | 33 | 3.5 | 55.8  | 14.3 | 28.6 | 39.9 | 1.4 |

|     |    |          |    |     |       |      |      |      |     |
|-----|----|----------|----|-----|-------|------|------|------|-----|
| 595 | LA | 20191023 | 29 | 1.0 | 100.9 | 28.9 | 52.6 | 95.2 | 1.3 |
| 597 | LA | 20191023 | 38 | 0.8 | 124.9 | 26.4 | 49.4 | 70.8 | 1.3 |
| 600 | LA | 20191024 | 34 | 2.5 | 111.6 | 27.4 | 41.7 | 3.3  | 4.6 |
| 610 | LA | 20191028 | 32 | 1.5 | 108.9 | 26.5 | 43.9 | 60.1 | 3.8 |
| 611 | LA | 20190926 | 37 | 0.5 | 108.9 | 17.1 | 34.2 | 59.4 | 1.1 |
| 613 | LA | 20190926 | 41 | 2.5 | 21.3  | 25.0 | 28.0 | 38.2 | 1.7 |
| 617 | LA | 20190926 | 32 | 4.5 | 21.3  | 12.5 | 23.5 | 34.8 | 3.7 |
| 622 | LA | 20190927 | 36 | 2.0 | 47.8  | 29.7 | 40.2 | 52.6 | 1.4 |
| 628 | LA | 20190930 | 31 | 3.5 | 55.8  | 19.1 | 35.8 | 50.6 | 2.3 |
| 641 | LA | 20191014 | 30 | 0.5 | 45.2  | 2.1  | 5.9  | 40.0 | 1.1 |
| 642 | LA | 20191014 | 29 | 3.0 | 53.1  | 20.0 | 40.0 | 48.7 | 1.2 |
| 648 | LA | 20191014 | 28 | 2.5 | 204.6 | 30.9 | 57.5 | 85.5 | 1.6 |
| 656 | LA | 20191015 | 30 | 1.0 | 180.6 | 30.9 | 44.1 | 64.0 | 3.3 |
| 660 | LA | 20190909 | 34 | 2.0 | 93.0  | 17.1 | 40.9 | /    | 1.2 |
| 663 | LA | 20190909 | 25 | 0.5 | 130.2 | 30.6 | 54.7 | 73.0 | 2.6 |
| 664 | LA | 20190910 | 32 | 0.5 | 61.1  | 12.2 | 30.9 | 52.7 | 1.3 |
| 665 | LA | 20190910 | 30 | 3.5 | 69.1  | 11.7 | 29.7 | 55.0 | 1.6 |
| 667 | LA | 20190911 | 30 | 1.0 | 93.0  | 8.3  | 15.7 | 40.0 | 1.1 |
| 674 | LA | 20190917 | 33 | 1.5 | 37.2  | 14.7 | 27.7 | 40.9 | 1.6 |
| 677 | LA | 20190917 | 38 | 9.0 | 55.8  | 30.0 | 45.2 | 59.3 | 1.8 |
| 681 | LA | 20190919 | 21 | 1.5 | 167.4 | 26.9 | 51.1 | 79.6 | 2.4 |
| 683 | LA | 20190919 | 30 | 3.5 | 45.2  | 13.2 | 24.3 | 48.1 | 2.6 |
| 688 | LA | 20190921 | 39 | 3.5 | 39.8  | 20.0 | 26.7 | 45.7 | 1.4 |
| 690 | LA | 20190921 | 36 | 0.5 | 84.3  | 16.5 | 34.6 | 59.5 | 1.3 |
| 695 | LA | 20190923 | 26 | 3.0 | 15.9  | 7.4  | 11.5 | 33.5 | 2.7 |
| 696 | LA | 20190923 | 32 | 1.0 | 77.0  | 22.2 | 40.9 | 50.4 | 4.7 |
| 705 | LA | 20190925 | 34 | 1.0 | 39.8  | 4.5  | 13.4 | 40.2 | 3.9 |
| 708 | LA | 20190926 | 21 | 1.0 | 122.2 | 19.6 | 36.6 | 63.3 | 1.9 |
| 709 | LA | 20190926 | 38 | 4.0 | 147.4 | 27.0 | 61.2 | 96.5 | 1.4 |
| 714 | LA | 20190902 | 30 | 2.5 | 103.6 | 28.2 | 39.7 | 61.6 | 1.5 |
| 719 | LA | 20190903 | 40 | 5.5 | 111.6 | 19.1 | 28.6 | 41.9 | 1.3 |
| 720 | LA | 20190904 | 37 | 1.0 | 170.0 | 28.2 | 40.7 | 41.9 | 1.3 |
| 722 | LA | 20190904 | 28 | 4.0 | 116.9 | 29.5 | 50.0 | 74.4 | 1.7 |
| 733 | LA | 20190817 | 27 | 1.0 | 225.8 | 31.8 | 57.7 | 99.7 | 1.1 |
| 736 | LA | 20190819 | 32 | 4.5 | 26.7  | 15.6 | 30.3 | 48.1 | 2.2 |
| 740 | LA | 20190820 | 28 | 5.5 | 85.0  | 25.1 | 41.6 | 53.8 | 1.1 |
| 743 | LA | 20190821 | 39 | 1.0 | 124.9 | 22.3 | 36.0 | 58.9 | 1.1 |
| 744 | LA | 20190821 | 26 | 5.0 | 93.0  | 29.5 | 48.5 | 48.0 | 2.4 |
| 752 | LA | 20190822 | 33 | 2.0 | 175.3 | 31.8 | 56.0 | 95.4 | 1.1 |
| 754 | LA | 20190823 | 29 | 3.0 | 103.6 | 30.8 | 47.0 | 55.7 | 2.4 |
| 756 | LA | 20190824 | 28 | 6.5 | 55.8  | 10.0 | 14.3 | 39.5 | 4.8 |
| 758 | LA | 20190824 | 33 | 2.0 | 66.4  | 21.8 | 46.7 | 72.2 | 1.1 |
| 759 | LA | 20190826 | 27 | 2.5 | 37.2  | 13.1 | 26.6 | 40.9 | 4.6 |
| 762 | LA | 20190826 | 32 | 3.0 | 225.8 | 28.3 | 50.3 | 93.6 | 1.1 |
| 763 | LA | 20190826 | 42 | 1.5 | 178.0 | 26.9 | 48.8 | 84.3 | 1.1 |

|     |    |          |    |     |       |      |      |       |     |
|-----|----|----------|----|-----|-------|------|------|-------|-----|
| 764 | LA | 20190827 | 36 | 1.0 | 104.5 | 30.0 | 45.3 | 89.2  | 1.1 |
| 767 | LA | 20190827 | 39 | 5.5 | 69.1  | 7.7  | 17.5 | 52.0  | 1.3 |
| 780 | LA | 20190803 | 42 | 2.0 | 177.3 | 25.5 | 47.6 | 84.3  | 1.1 |
| 783 | LA | 20190805 | 30 | 2.5 | 87.7  | 15.9 | 28.5 | 57.9  | 1.4 |
| 784 | LA | 20190805 | 28 | 5.5 | 93.0  | 22.9 | 38.1 | 60.5  | 1.1 |
| 785 | LA | 20190805 | 27 | 4.5 | 209.9 | 29.1 | 51.0 | 55.0  | 1.6 |
| 792 | LA | 20190806 | 33 | 2.5 | 151.4 | 31.8 | 48.6 | 62.5  | 1.8 |
| 794 | LA | 20190807 | 35 | 4.0 | 63.8  | 18.8 | 29.2 | 54.0  | 1.3 |
| 795 | LA | 20190807 | 26 | 3.5 | 58.4  | 31.8 | 46.6 | 77.4  | 1.1 |
| 798 | LA | 20190807 | 36 | 5.5 | 143.5 | 25.2 | 47.8 | 61.9  | 1.3 |
| 800 | LA | 20190808 | 25 | 1.5 | 172.7 | 30.8 | 61.6 | /     | 1.6 |
| 802 | LA | 20190809 | 29 | 4.0 | 119.5 | 31.1 | 44.4 | 60.4  | 1.1 |
| 804 | LA | 20190809 | 28 | 4.0 | 82.0  | 27.2 | 42.0 | /     | 1.3 |
| 805 | LA | 20190809 | 29 | 4.0 | 100.9 | 28.9 | 42.1 | 55.7  | 2.4 |
| 808 | LA | 20190812 | 22 | 5.0 | 38.1  | 24.4 | 42.7 | 118.4 | 1.3 |
| 813 | LA | 20190812 | 21 | 1.5 | 193.9 | 24.7 | 41.1 | 57.0  | 5.8 |
| 817 | LA | 20190813 | 30 | 0.5 | 77.0  | 4.0  | 7.0  | 59.0  | 1.1 |
| 819 | LA | 20190813 | 31 | 3.0 | 114.2 | 15.9 | 30.6 | 42.5  | 1.8 |
| 820 | LA | 20190813 | 29 | 4.0 | 140.8 | 20.8 | 51.0 | 94.6  | 1.1 |
| 822 | LA | 20190813 | 39 | 5.0 | 103.6 | 27.7 | 48.8 | 80.5  | 1.2 |
| 825 | LA | 20190814 | 21 | 1.0 | 183.3 | 26.0 | 43.4 | 49.0  | 5.6 |
| 826 | LA | 20190815 | 41 | 2.0 | 63.8  | 17.6 | 35.7 | 50.8  | 1.4 |
| 827 | LA | 20190815 | 33 | 2.0 | 39.8  | 19.1 | 24.0 | 44.6  | 1.7 |
| 832 | LA | 20190709 | 30 | 3.8 | 116.9 | 20.4 | 42.4 | 61.4  | 1.1 |
| 834 | LA | 20190709 | 29 | 3.5 | 193.9 | 31.5 | 55.7 | 77.1  | 2.3 |
| 836 | LA | 20190709 | 31 | 2.0 | 122.2 | 20.4 | 45.6 | 66.3  | 2.6 |
| 837 | LA | 20190710 | 37 | 0.5 | 77.0  | 17.2 | 38.9 | 53.6  | 1.4 |
| 838 | LA | 20190710 | 24 | 4.5 | 122.2 | 31.9 | 48.2 | 60.4  | 2.9 |
| 842 | LA | 20190713 | 32 | 5.0 | 39.8  | 20.9 | 34.7 | 44.6  | 3.7 |
| 847 | LA | 20190716 | 26 | 2.0 | 167.4 | 27.8 | 50.8 | 92.0  | 1.1 |
| 849 | LA | 20190716 | 39 | 4.0 | 74.4  | 24.6 | 38.1 | 57.5  | 1.2 |
| 850 | LA | 20190716 | 35 | 4.0 | 108.9 | 29.7 | 48.0 | 63.8  | 1.7 |
| 852 | LA | 20190717 | 30 | 5.5 | 93.0  | 30.6 | 49.0 | 62.2  | 1.5 |
| 854 | LA | 20190717 | 29 | 5.0 | 119.5 | 24.1 | 42.2 | 57.1  | 1.8 |
| 860 | LA | 20190720 | 36 | 4.5 | 50.5  | 25.9 | 38.3 | /     | 1.1 |
| 862 | LA | 20190722 | 22 | 2.0 | 71.7  | 21.8 | 40.8 | /     | 1.4 |
| 863 | LA | 20191722 | 26 | 6.0 | 79.7  | 29.7 | 46.7 | 47.3  | 1.9 |
| 874 | LA | 20190802 | 34 | 4.0 | 85.0  | 28.1 | 43.7 | 62.6  | 3.1 |
| 884 | LA | 20190624 | 39 | 2.0 | 87.7  | 13.8 | 38.5 | 42.9  | 1.4 |
| 886 | LA | 20190624 | 36 | 1.5 | 61.1  | 13.0 | 21.2 | 40.6  | 1.2 |
| 892 | LA | 20190626 | 32 | 4.5 | 127.5 | 16.7 | 35.5 | 48.8  | 1.6 |
| 899 | LA | 20190627 | 34 | 5.0 | 53.1  | 16.3 | 40.9 | 63.2  | 1.5 |
| 903 | LA | 20190629 | 30 | 1.0 | 93.0  | 25.7 | 40.8 | 47.0  | 1.4 |
| 905 | LA | 20190629 | 38 | 4.0 | 87.7  | 19.6 | 43.2 | /     | 1.1 |
| 907 | LA | 20190701 | 32 | 1.0 | 167.4 | 28.2 | 50.8 | 62.0  | 1.8 |

|      |    |          |    |     |       |      |      |      |     |
|------|----|----------|----|-----|-------|------|------|------|-----|
| 910  | LA | 20190701 | 35 | 5.0 | 69.1  | 19.2 | 38.4 | 51.9 | 1.4 |
| 912  | LA | 20190702 | 30 | 2.5 | 159.4 | 26.3 | 42.6 | 51.3 | 1.2 |
| 913  | LA | 20190703 | 32 | 2.0 | 79.7  | 31.7 | 45.5 | 61.8 | 2.4 |
| 917  | LA | 20190705 | 35 | 2.0 | 278.9 | 30.4 | 62.8 | 87.3 | 1.1 |
| 918  | LA | 20190705 | 37 | 2.0 | 85.0  | 10.8 | 27.1 | 40.9 | 3.8 |
| 923  | LA | 20190708 | 37 | 1.0 | 93.0  | 21.5 | 40.1 | 63.0 | 1.6 |
| 924  | LA | 20190708 | 31 | 0.5 | 79.7  | 24.4 | 45.5 | 71.1 | 1.2 |
| 937  | LA | 20190610 | 31 | 2.0 | 74.4  | 20.6 | 47.4 | 68.5 | 1.4 |
| 940  | LA | 20190611 | 30 | 3.0 | 69.1  | 25.0 | 41.3 | /    | 1.3 |
| 941  | LA | 20190611 | 35 | 1.5 | 47.8  | 27.8 | 45.4 | 61.9 | 1.7 |
| 948  | LA | 20190612 | 27 | 3.0 | 79.7  | 31.7 | 46.7 | 73.6 | 1.2 |
| 954  | LA | 20190614 | 35 | 3.5 | 125.4 | 29.6 | 50.8 | 94.8 | 1.2 |
| 963  | LA | 20190618 | 28 | 1.0 | 106.3 | 28.5 | 50.6 | 63.5 | 2.6 |
| 965  | LA | 20190619 | 20 | 2.5 | 45.2  | 17.7 | 35.3 | 55.1 | 4.7 |
| 971  | LA | 20190620 | 28 | 5.5 | 111.6 | 30.0 | 49.0 | /    | 1.4 |
| 975  | LA | 20190622 | 30 | 2.5 | 50.5  | 25.1 | 34.2 | 44.7 | 1.2 |
| 977  | LA | 20190514 | 22 | 2.0 | 53.1  | 18.6 | 35.0 | 51.3 | 1.6 |
| 979  | LA | 20190514 | 26 | 2.0 | 74.4  | 29.0 | 51.3 | 82.2 | 1.1 |
| 982  | LA | 20190515 | 32 | 1.5 | 132.8 | 20.5 | 40.9 | 50.8 | 2.6 |
| 985  | LA | 20190516 | 41 | 3.0 | 43.4  | 22.5 | 34.7 | 50.0 | 1.6 |
| 988  | LA | 20190517 | 28 | 4.0 | 42.5  | 25.0 | 40.8 | 56.1 | 1.1 |
| 991  | LA | 20190520 | 32 | 7.0 | 74.4  | 14.7 | 39.3 | 52.0 | 1.6 |
| 992  | LA | 20190520 | 32 | 0.5 | 90.3  | 29.5 | 44.2 | 63.4 | 1.2 |
| 996  | LA | 20190522 | 26 | 4.5 | 111.6 | 19.7 | 41.7 | 69.8 | 1.5 |
| 999  | LA | 20190523 | 26 | 2.0 | 82.4  | 29.0 | 49.2 | 55.0 | 1.6 |
| 1001 | LA | 20190523 | 35 | 5.0 | 135.5 | 22.5 | 48.0 | 63.1 | 2.2 |
| 1002 | LA | 20190523 | 29 | 5.5 | 156.7 | 24.2 | 47.5 | 82.9 | 1.5 |
| 1004 | LA | 20190524 | 37 | 2.0 | 127.5 | 23.3 | 43.3 | 60.3 | 1.5 |
| 1007 | LA | 20190525 | 38 | 3.0 | 77.0  | 17.2 | 42.6 | /    | 1.3 |
| 1008 | LA | 20190525 | 27 | 6.5 | 127.5 | 27.1 | 52.9 | 90.5 | 1.1 |
| 1009 | LA | 20190527 | 36 | 1.0 | 191.3 | 29.2 | 48.6 | 95.6 | 1.3 |
| 1013 | LA | 20190529 | 32 | 2.0 | 85.0  | 31.2 | 47.2 | 63.9 | 1.7 |
| 1015 | LA | 20190529 | 27 | 2.0 | 143.5 | 27.0 | 44.4 | 59.4 | 1.2 |
| 1022 | LA | 20190531 | 36 | 3.5 | 55.8  | 24.7 | 42.9 | 68.8 | 6.4 |
| 1026 | LA | 20190603 | 32 | 5.0 | 167.4 | 28.2 | 47.6 | 63.6 | 1.2 |
| 1032 | LA | 20190429 | 24 | 4.0 | 87.7  | 24.3 | 47.2 | 58.0 | 3.2 |
| 1033 | LA | 20190429 | 29 | 1.5 | 207.2 | 30.8 | 54.8 | 77.9 | 1.2 |
| 1035 | LA | 20190505 | 28 | 5.0 | 95.6  | 22.3 | 40.8 | 51.8 | 1.7 |
| 1038 | LA | 20190505 | 39 | 1.0 | 106.3 | 17.5 | 35.5 | 46.0 | 6.9 |
| 1040 | LA | 20190506 | 22 | 2.0 | 73.7  | 24.8 | 41.9 | 56.2 | 1.3 |
| 1049 | LA | 20190507 | 29 | 1.5 | 47.8  | 20.3 | 33.3 | 53.8 | 4.1 |
| 1051 | LA | 20190508 | 31 | 8.0 | 43.6  | 18.3 | 30.1 | 53.3 | 2.7 |
| 1053 | LA | 20190508 | 32 | 2.0 | 37.2  | 19.3 | 34.0 | 52.8 | 1.6 |
| 1054 | LA | 20190508 | 33 | 5.0 | 74.1  | 22.5 | 40.4 | 59.1 | 1.4 |
| 1055 | LA | 20190508 | 29 | 4.5 | 116.9 | 27.2 | 47.7 | 77.0 | 1.2 |

|      |    |          |    |     |       |      |      |      |     |
|------|----|----------|----|-----|-------|------|------|------|-----|
| 1057 | LA | 20190509 | 32 | 0.5 | 98.0  | 14.9 | 27.1 | 50.6 | 1.2 |
| 1058 | LA | 20190509 | 31 | 4.0 | 100.3 | 30.2 | 48.7 | 65.0 | 1.7 |
| 1061 | LA | 20190510 | 27 | 5.0 | 24.9  | 16.8 | 25.2 | 51.8 | 3.7 |
| 1067 | LA | 20190511 | 32 | 3.5 | 65.4  | 28.4 | 40.2 | 60.8 | 1.1 |
| 1068 | LA | 20190511 | 37 | 2.0 | 96.1  | 25.5 | 46.2 | /    | 1.2 |
| 1072 | LA | 20190513 | 27 | 2.0 | 135.5 | 29.4 | 47.0 | 55.5 | 1.3 |
| 1073 | LA | 20190513 | 15 | 1.0 | 86.9  | 24.5 | 42.8 | 60.2 | 1.5 |
| 1075 | LA | 20190514 | 32 | 2.0 | 90.3  | 11.8 | 23.6 | 47.0 | 1.8 |
| 1078 | LA | 20190415 | 30 | 4.0 | 87.7  | 30.4 | 42.5 | 61.6 | 1.1 |
| 1081 | LA | 20190415 | 30 | 2.0 | 124.9 | 22.8 | 42.6 | 57.8 | 1.3 |
| 1082 | LA | 20190415 | 27 | 2.5 | 159.4 | 28.3 | 47.0 | 70.0 | 1.6 |
| 1087 | LA | 20190416 | 28 | 2.5 | 170.0 | 28.9 | 51.4 | 97.0 | 1.5 |
| 1090 | LA | 20190416 | 35 | 4.0 | 77.0  | 31.9 | 46.6 | 68.8 | 1.7 |
| 1095 | LA | 20190417 | 28 | 5.0 | 135.5 | 26.4 | 48.0 | 69.1 | 1.1 |
| 1100 | LA | 20190419 | 28 | 1.5 | 61.1  | 9.0  | 15.9 | 52.5 | 2.2 |
| 1102 | LA | 20190420 | 32 | 5.0 | 69.1  | 24.6 | 46.2 | 63.0 | 1.7 |
| 1106 | LA | 20190420 | 42 | 2.0 | 98.3  | 24.3 | 40.5 | 59.6 | 1.1 |
| 1107 | LA | 20190422 | 32 | 2.5 | 167.4 | 13.0 | 38.4 | 55.6 | 1.1 |
| 1110 | LA | 20190423 | 38 | 3.0 | 71.7  | 24.2 | 36.5 | 50.7 | 1.5 |
| 1115 | LA | 20190424 | 30 | 3.0 | 103.6 | 12.1 | 23.5 | 54.1 | 2.6 |
| 1138 | LA | 20190401 | 27 | 5.0 | 61.1  | 17.4 | 23.9 | 43.1 | 3.3 |
| 1139 | LA | 20190401 | 32 | 2.0 | 93.0  | 25.7 | 40.9 | 58.4 | 1.3 |
| 1143 | LA | 20190402 | 31 | 2.0 | 26.7  | 11.1 | 25.7 | 51.7 | 1.3 |
| 1144 | LA | 20190402 | 28 | 2.0 | 111.6 | 18.1 | 34.3 | 43.0 | 1.5 |
| 1149 | LA | 20190404 | 38 | 2.0 | 124.9 | 5.6  | 14.1 | 59.5 | 1.2 |
| 1152 | LA | 20190408 | 34 | 2.0 | 135.5 | 19.6 | 46.3 | 69.0 | 1.7 |
| 1161 | LA | 20190410 | 26 | 5.0 | 93.0  | 15.3 | 33.3 | 52.7 | 1.5 |
| 1163 | LA | 20190410 | 31 | 2.0 | 119.5 | 25.8 | 40.4 | 56.8 | 2.3 |
| 1164 | LA | 20190410 | 32 | 3.5 | 148.8 | 26.7 | 46.3 | 80.8 | 1.2 |
| 1168 | LA | 20190411 | 41 | 3.0 | 47.8  | 12.2 | 27.8 | 50.6 | 1.8 |
| 1174 | LA | 20190413 | 37 | 5.5 | 74.4  | 18.6 | 37.3 | 57.0 | 2.3 |
| 1178 | LA | 20190318 | 27 | 4.0 | 143.5 | 24.1 | 45.4 | 71.1 | 1.4 |
| 1180 | LA | 20190318 | 42 | 2.0 | 74.4  | 28.5 | 42.8 | 59.2 | 3.0 |
| 1184 | LA | 20190319 | 32 | 5.0 | 90.3  | 14.7 | 32.3 | 50.9 | 1.1 |
| 1188 | LA | 20190320 | 31 | 7.5 | 24.7  | 9.8  | 24.8 | 55.3 | 2.4 |
| 1197 | LA | 20190322 | 31 | 1.5 | 127.5 | 29.1 | 43.7 | 56.0 | 1.3 |
| 1199 | LA | 20190322 | 28 | 5.0 | 77.0  | 27.6 | 41.4 | 73.9 | 1.5 |
| 1200 | LA | 20190325 | 33 | 5.0 | 61.1  | 27.2 | 40.2 | 55.9 | 1.4 |
| 1201 | LA | 20190325 | 22 | 1.5 | 83.3  | 24.7 | 44.8 | 80.3 | 1.2 |
| 1202 | LA | 20190325 | 32 | 9.0 | 37.2  | 20.9 | 35.7 | 50.8 | 1.7 |
| 1213 | LA | 20190327 | 30 | 5.0 | 63.8  | 25.0 | 41.7 | 59.0 | 1.6 |
| 1215 | LA | 20190327 | 24 | 4.0 | 130.4 | 27.2 | 44.5 | 51.7 | 4.0 |
| 1219 | LA | 20190328 | 28 | 3.0 | 50.5  | 14.4 | 21.1 | 57.8 | 1.7 |
| 1221 | LA | 20190328 | 29 | 5.0 | 111.6 | 30.9 | 47.6 | 88.0 | 1.1 |
| 1224 | LA | 20190329 | 27 | 1.5 | 24.3  | 9.5  | 23.3 | 55.8 | 1.6 |



|      |    |          |    |     |       |      |      |       |     |
|------|----|----------|----|-----|-------|------|------|-------|-----|
| 1227 | LA | 20190221 | 24 | 3.0 | 103.6 | 23.1 | 45.3 | 70.2  | 1.1 |
| 1232 | LA | 20190222 | 36 | 3.5 | 82.4  | 22.6 | 36.6 | 61.2  | 1.1 |
| 1236 | LA | 20190223 | 31 | 5.0 | 90.3  | 30.4 | 48.0 | 88.6  | 1.1 |
| 1237 | LA | 20190223 | 27 | 6.0 | 45.2  | 14.0 | 33.1 | 56.0  | 1.3 |
| 1239 | LA | 20190223 | 29 | 1.0 | 85.0  | 20.1 | 40.2 | 60.1  | 3.3 |
| 1242 | LA | 20190225 | 33 | 4.0 | 68.8  | 12.1 | 23.3 | 54.4  | 1.3 |
| 1248 | LA | 20190226 | 22 | 2.0 | 70.8  | 15.7 | 30.0 | 53.3  | 1.6 |
| 1252 | LA | 20190226 | 24 | 2.0 | 71.7  | 18.5 | 40.7 | 62.4  | 1.5 |
| 1262 | LA | 20190302 | 30 | 0.5 | 116.9 | 23.0 | 43.1 | 50.6  | 1.7 |
| 1264 | LA | 20190302 | 32 | 4.0 | 88.6  | 28.1 | 43.6 | 120.1 | 1.3 |
| 1271 | LA | 20190305 | 35 | 4.5 | 130.2 | 28.5 | 44.0 | 61.8  | 2.3 |
| 1275 | LA | 20190305 | 29 | 3.5 | 82.4  | 19.3 | 33.8 | 51.2  | 1.3 |
| 1277 | LA | 20190306 | 27 | 1.5 | 27.1  | 6.4  | 21.7 | 55.8  | 1.2 |
| 1279 | LA | 20190306 | 27 | 4.0 | 42.5  | 14.0 | 35.6 | 46.0  | 3.7 |
| 1280 | LA | 20190306 | 41 | 2.0 | 66.4  | 11.6 | 30.7 | 53.9  | 1.5 |
| 1283 | LA | 20190307 | 32 | 2.5 | 111.6 | 26.2 | 40.5 | 62.2  | 1.5 |
| 1292 | LA | 20190309 | 28 | 1.0 | 98.3  | 23.4 | 40.5 | /     | 1.2 |
| 1293 | LA | 20190309 | 28 | 3.0 | 154.1 | 27.6 | 50.4 | 80.2  | 1.3 |
| 1298 | LA | 20190311 | 22 | 5.5 | 100.9 | 13.1 | 26.6 | 47.6  | 1.5 |
| 1301 | LA | 20190312 | 27 | 1.5 | 156.7 | 25.4 | 42.3 | 58.4  | 1.1 |
| 1307 | LA | 20190313 | 39 | 0.5 | 101.8 | 31.3 | 52.2 | 99.3  | 1.1 |
| 1308 | LA | 20190313 | 30 | 6.0 | 69.1  | 26.9 | 45.7 | 71.9  | 3.3 |
| 1314 | LA | 20190515 | 29 | 4.0 | 103.6 | 2.1  | 10.2 | 45.1  | 1.4 |
| 1322 | LA | 20190212 | 29 | 1.0 | 50.5  | 25.4 | 42.9 | 77.5  | 1.4 |
| 1326 | LA | 20190213 | 32 | 4.0 | 47.5  | 28.9 | 45.5 | 70.3  | 1.1 |
| 1327 | LA | 20190213 | 23 | 1.0 | 78.0  | 31.0 | 61.6 | 118.0 | 1.4 |
| 1329 | LA | 20190214 | 29 | 1.0 | 58.4  | 18.1 | 45.4 | 74.0  | 1.3 |
| 1330 | LA | 20190214 | 27 | 2.5 | 64.7  | 31.6 | 61.9 | 99.2  | 1.1 |
| 1333 | LA | 20190214 | 37 | 2.0 | 124.9 | 27.4 | 48.2 | 79.6  | 1.1 |
| 1334 | LA | 20190214 | 32 | 1.0 | 72.7  | 22.4 | 44.8 | 58.8  | 1.3 |
| 1348 | LA | 20190216 | 30 | 0.5 | 98.3  | 29.8 | 46.0 | 60.2  | 1.1 |
| 1349 | LA | 20190218 | 24 | 5.5 | 31.9  | 9.5  | 25.0 | 50.3  | 4.2 |
| 1350 | LA | 20190218 | 35 | 6.5 | 140.8 | 30.2 | 54.0 | 92.5  | 1.3 |
| 1356 | LA | 20190218 | 30 | 5.5 | 69.1  | 15.3 | 40.8 | 59.7  | 2.5 |
| 1360 | LA | 20190219 | 36 | 3.5 | 132.8 | 30.0 | 50.2 | 88.0  | 1.6 |
| 1367 | LA | 20190220 | 26 | 1.5 | 55.8  | 19.5 | 38.5 | 55.9  | 3.6 |
| 1372 | LA | 20190116 | 37 | 1.0 | 77.0  | 20.0 | 45.5 | 66.2  | 1.1 |
| 1375 | LA | 20190118 | 30 | 5.0 | 42.5  | 25.0 | 37.5 | /     | 1.2 |
| 1377 | LA | 20190119 | 32 | 3.0 | 108.9 | 5.9  | 14.2 | 44.8  | 1.3 |
| 1383 | LA | 20190121 | 32 | 2.0 | 104.9 | 29.4 | 58.3 | 88.3  | 1.1 |
| 1386 | LA | 20190122 | 25 | 2.0 | 132.8 | 30.0 | 53.0 | 97.0  | 1.1 |
| 1387 | LA | 20190122 | 33 | 3.0 | 124.9 | 25.1 | 48.1 | 87.5  | 1.1 |
| 1394 | LA | 20190126 | 30 | 5.0 | 69.6  | 19.8 | 33.0 | 62.5  | 1.2 |
| 1395 | LA | 20190126 | 28 | 3.0 | 116.9 | 24.3 | 50.3 | 86.3  | 1.1 |
| 1397 | LA | 20190128 | 28 | 2.0 | 98.3  | 29.7 | 49.0 | 61.9  | 1.3 |

|      |    |          |    |     |       |      |      |       |     |
|------|----|----------|----|-----|-------|------|------|-------|-----|
| 1401 | LA | 20190129 | 29 | 4.0 | 46.2  | 19.0 | 40.7 | 56.2  | 1.5 |
| 1404 | LA | 20190129 | 28 | 6.0 | 77.0  | 12.5 | 34.5 | 59.7  | 1.2 |
| 1408 | LA | 20190130 | 32 | 4.0 | 130.2 | 27.5 | 53.9 | 93.3  | 1.5 |
| 1414 | LA | 20190202 | 42 | 5.0 | 124.9 | 25.2 | 50.4 | 70.1  | 1.3 |
| 1416 | LA | 20190211 | 34 | 2.0 | 80.8  | 29.7 | 53.8 | 108.4 | 1.2 |
| 1420 | LA | 20190212 | 26 | 0.5 | 90.3  | 21.0 | 41.2 | 60.1  | 1.4 |
| 1424 | LA | 20190102 | 38 | 4.0 | 88.6  | 28.1 | 56.3 | 85.7  | 1.1 |
| 1425 | LA | 20190103 | 29 | 2.0 | 64.1  | 13.0 | 25.4 | /     | 1.4 |
| 1430 | LA | 20190107 | 28 | 4.5 | 38.1  | 5.7  | 15.3 | /     | 1.8 |
| 1431 | LA | 20190107 | 29 | 2.5 | 83.4  | 24.2 | 50.3 | 81.3  | 1.2 |
| 1434 | LA | 20190108 | 27 | 5.0 | 77.8  | 20.5 | 37.6 | 53.1  | 1.4 |
| 1436 | LA | 20190108 | 39 | 2.0 | 53.1  | 20.5 | 34.1 | 48.6  | 1.2 |
| 1441 | LA | 20190108 | 35 | 2.5 | 69.1  | 26.9 | 43.2 | 60.0  | 1.6 |
| 1442 | LA | 20190109 | 42 | 3.5 | 85.0  | 17.4 | 36.2 | 62.9  | 1.2 |
| 1443 | LA | 20190110 | 31 | 1.5 | 116.9 | 25.6 | 41.2 | 42.6  | 1.8 |
| 1447 | LA | 20190110 | 31 | 6.0 | 77.0  | 5.3  | 8.0  | 44.0  | 2.3 |
| 1452 | LA | 20190111 | 33 | 2.0 | 114.2 | 21.0 | 43.8 | 51.7  | 1.6 |
| 1455 | LA | 20190112 | 30 | 5.0 | 114.2 | 21.0 | 52.6 | 94.3  | 1.1 |
| 1462 | LA | 20190115 | 36 | 3.5 | 146.1 | 29.1 | 52.0 | 100.9 | 1.1 |
| 1463 | LA | 20190115 | 32 | 2.0 | 58.4  | 27.2 | 38.6 | 56.0  | 1.4 |
| 1465 | LA | 20190116 | 35 | 2.0 | 84.6  | 26.9 | 43.9 | 89.4  | 1.1 |
| 1468 | LA | 20201130 | 25 | 1.0 | 127.5 | 25.0 | 46.3 | 60.1  | 2.9 |
| 1471 | LA | 20201130 | 31 | 2.0 | 75.2  | 25.5 | 48.9 | 80.9  | 1.1 |
| 1475 | LA | 20201128 | 28 | 3.0 | 18.1  | 7.8  | 22.5 | 49.5  | 1.3 |
| 1478 | LA | 20201127 | 33 | 3.0 | 26.6  | 20.0 | 33.5 | 55.7  | 1.1 |
| 1479 | LA | 20201126 | 26 | 3.0 | 75.6  | 26.7 | 50.8 | 63.1  | 1.5 |
| 17   | LA | 20201111 | 32 | 4.5 | 70.8  | 33.9 | 47.1 | 74.1  | 1.3 |
| 33   | LA | 20201103 | 33 | 3.0 | 78.1  | 32.7 | 47.6 | 85.4  | 1.2 |
| 421  | LA | 20191221 | 29 | 1.5 | 72.8  | 31.9 | 49.9 | 97.0  | 1.4 |
| 902  | LA | 20190628 | 27 | 2.5 | 89.4  | 34.2 | 49.2 | 67.4  | 2.2 |
| 1071 | LA | 20190513 | 27 | 5.0 | 131.2 | 34.4 | 48.2 | 63.7  | 1.2 |
| 1085 | LA | 20190415 | 24 | 4.5 | 140.8 | 34.0 | 45.8 | 77.2  | 1.4 |
| 1117 | LA | 20190424 | 35 | 3.5 | 58.4  | 36.4 | 49.1 | 88.1  | 3.5 |
| 1127 | LA | 20190329 | 36 | 5.0 | 101.7 | 33.9 | 47.0 | 90.1  | 1.2 |
| 1172 | LA | 20190413 | 32 | 1.5 | 78.2  | 33.1 | 46.2 | 81.5  | 1.7 |
| 1243 | LA | 20190225 | 37 | 3.0 | 103.6 | 35.9 | 48.7 | 66.2  | 1.1 |
| 1253 | LA | 20190227 | 31 | 3.0 | 58.4  | 32.2 | 47.5 | 64.2  | 1.6 |
| 1255 | LA | 20190228 | 25 | 2.5 | 103.6 | 35.9 | 47.9 | 95.1  | 1.3 |
| 1296 | LA | 20190311 | 32 | 3.0 | 79.7  | 34.2 | 47.5 | 89.5  | 1.3 |
| 1338 | LA | 20190214 | 27 | 3.0 | 103.6 | 33.3 | 46.5 | 61.6  | 1.5 |
| 1364 | LA | 20190220 | 31 | 3.5 | 66.4  | 32.8 | 46.2 | 96.2  | 1.4 |
| 1476 | LA | 20201127 | 30 | 3.0 | 103.6 | 33.3 | 46.6 | /     | 1.1 |
