# Supplementary material for: Semen microbiota in normal and leukocytospermic males
Source: PubMed Central journal article supplement — Asian J Androl. 2021 Dec 10;24(4):398–405. doi: 10.4103/aja202172 (PMC9295480; doi:10.4103/aja202172), 2021-12-10
Supplement: AJA-24-398_Suppl2.pdf [file AJA-24-398_Suppl2.pdf]

| No. | Group    | Age(year) | Volume(ml) | Sperm concentration(10 <sup>6</sup> /ml) | Total sperm count | a (%) | b (%) | Progressive motility(%) | c (%) | Total motility(%) | d (%) | Acrosin activity( $\mu$ U/106) | Leukocytospermia(10 <sup>6</sup> /ml) | WBC(10 <sup>9</sup> /L) | Hb    | PLT(10 <sup>12</sup> /ml) | smoking(1:yes,0 no) |
|-----|----------|-----------|------------|------------------------------------------|-------------------|-------|-------|-------------------------|-------|-------------------|-------|--------------------------------|---------------------------------------|-------------------------|-------|---------------------------|---------------------|
| 2   | Normal1  | 30        | 4.5        | 82.4                                     | 370.8             | 19.4  | 17.5  | 36.9                    | 18.0  | 54.9              | 45.1  | 100.4                          | 0.5                                   | 6.0                     | 158.0 | 287.0                     | 1                   |
| 3   | Normal2  | 29        | 3.0        | 156.7                                    | 470.1             | 22.0  | 35.6  | 57.6                    | 18.6  | 76.2              | 23.8  | 125.5                          | 0.5                                   | 6.2                     | 144.0 | 245.0                     | 0                   |
| 5   | Normal3  | 27        | 6.0        | 191.3                                    | 1147.8            | 23.6  | 23.1  | 46.7                    | 15.7  | 62.4              | 37.6  | 110.5                          | 0.6                                   | /                       | /     | /                         | 0                   |
| 8   | Normal4  | 28        | 2.5        | 305.5                                    | 763.8             | 39.1  | 30.0  | 69.1                    | 15.2  | 84.3              | 15.7  | 133.0                          | 0.6                                   | 5.8                     | 162.0 | 179.0                     | 0                   |
| 13  | Normal5  | 27        | 3.0        | 183.3                                    | 549.9             | 10.1  | 27.4  | 37.5                    | 19.3  | 56.8              | 43.2  | 104.7                          | 0.5                                   | 7.9                     | 146.0 | 200.0                     | 0                   |
| 18  | Normal6  | 28        | 4.0        | 156.7                                    | 626.8             | 10.2  | 32.2  | 42.4                    | 22.0  | 64.4              | 35.6  | 102.7                          | 0.9                                   | 5.6                     | 132.0 | 266.0                     | 0                   |
| 23  | Normal7  | 28        | 2.5        | 409.1                                    | 1022.8            | 19.2  | 31.5  | 50.7                    | 27.9  | 78.6              | 21.4  | 116.8                          | 0.6                                   | /                       | /     | /                         | 1                   |
| 33  | Normal8  | 26        | 2.5        | 350.7                                    | 876.8             | 15.9  | 26.5  | 42.4                    | 28.0  | 70.4              | 29.6  | 100.7                          | 0.9                                   | 7.9                     | 145.0 | 248.0                     | 1                   |
| 34  | Normal9  | 26        | 6.0        | 263.9                                    | 1583.4            | 16.1  | 37.2  | 53.3                    | 24.2  | 77.5              | 22.5  | 122.5                          | 0.6                                   | 6.8                     | 132.0 | 209.0                     | 0                   |
| 46  | Normal10 | 28        | 3.0        | 178.0                                    | 534.0             | 19.4  | 29.9  | 49.3                    | 23.9  | 73.2              | 26.8  | 121.5                          | 0.5                                   | 5.9                     | 142.0 | 211.0                     | 0                   |
| 53  | Normal11 | 29        | 2.0        | 168.4                                    | 336.8             | 15.5  | 23.3  | 38.8                    | 19.4  | 58.2              | 41.8  | 97.7                           | 0.4                                   | 6.8                     | 133.0 | 190.0                     | 0                   |
| 57  | Normal12 | 35        | 3.0        | 183.3                                    | 549.9             | 11.6  | 30.4  | 42.0                    | 22.7  | 64.7              | 35.3  | 110.6                          | 0.9                                   | 7.9                     | 129.0 | 218.0                     | 0                   |
| 62  | Normal13 | 29        | 1.0        | 212.5                                    | 212.5             | 13.8  | 22.5  | 36.3                    | 17.9  | 54.2              | 45.8  | 66.9                           | 0.8                                   | 8.2                     | 140.0 | 227.0                     | 0                   |
| 67  | Normal14 | 29        | 2.0        | 183.3                                    | 366.6             | 37.7  | 20.3  | 58.0                    | 24.6  | 82.6              | 17.4  | 125.9                          | 0.8                                   | 9.0                     | 151.0 | 268.0                     | 0                   |
| 79  | Normal15 | 29        | 3.0        | 135.5                                    | 406.5             | 22.5  | 32.4  | 54.9                    | 27.5  | 82.4              | 17.6  | 120.0                          | 0.7                                   | /                       | /     | /                         | 1                   |
| 90  | Normal16 | 30        | 2.0        | 261.2                                    | 522.4             | 14.2  | 37.6  | 51.8                    | 25.4  | 77.2              | 22.8  | 117.0                          | 0.6                                   | 6.0                     | 153.0 | 194.0                     | 0                   |
| 94  | Normal17 | 33        | 2.0        | 286.9                                    | 573.8             | 14.8  | 21.9  | 36.7                    | 35.5  | 72.2              | 27.8  | 111.5                          | 0.9                                   | /                       | /     | /                         | 1                   |
| 98  | Normal18 | 36        | 5.0        | 294.9                                    | 1474.5            | 23.4  | 20.7  | 44.1                    | 18.0  | 62.1              | 37.9  | 109.5                          | 0.7                                   | 6.4                     | 162.0 | 173.0                     | 0                   |
| 101 | Normal19 | 30        | 5.0        | 180.6                                    | 903.0             | 14.7  | 20.6  | 35.3                    | 38.2  | 73.5              | 26.5  | 55.9                           | 0.7                                   | 8.4                     | 168.0 | 255.0                     | 0                   |
| 112 | Normal20 | 22        | 5.0        | 124.9                                    | 624.5             | 21.3  | 27.7  | 49.0                    | 14.9  | 63.9              | 36.1  | 111.7                          | 0.8                                   | 6.8                     | 161.0 | 192.0                     | 0                   |
| 11  | Leu1     | 21        | 4.0        | 114.2                                    | 456.8             | 15.9  | 26.8  | 42.7                    | 20.9  | 63.6              | 36.4  | 97.2                           | 2.3                                   | 6.7                     | 162.0 | 269.0                     | 0                   |
| 16  | Leu2     | 31        | 4.0        | 184.2                                    | 736.8             | 17.8  | 20.6  | 38.4                    | 26.2  | 64.6              | 35.4  | 119.0                          | 1.2                                   | 7.0                     | 145.0 | 255.0                     | 1                   |
| 17  | Leu3     | 25        | 3.5        | 140.8                                    | 492.8             | 16.5  | 23.1  | 39.6                    | 13.2  | 52.8              | 47.2  | 75.5                           | 1.4                                   | 5.2                     | 157.0 | 222.0                     | 0                   |
| 25  | Leu4     | 30        | 3.0        | 170.0                                    | 510.0             | 12.5  | 23.4  | 35.9                    | 17.2  | 53.1              | 46.9  | 77.3                           | 1.4                                   | 8.2                     | 150.0 | 189.0                     | 0                   |
| 29  | Leu5     | 27        | 6.0        | 114.2                                    | 685.2             | 16.3  | 23.3  | 39.6                    | 14.0  | 53.6              | 46.4  | 66.0                           | 1.7                                   | 6.5                     | 133.0 | 170.0                     | 1                   |
| 30  | Leu6     | 28        | 3.0        | 114.2                                    | 342.6             | 15.8  | 32.6  | 48.4                    | 14.4  | 62.8              | 37.2  | 108.3                          | 1.2                                   | 5.3                     | 129.0 | 286.0                     | 0                   |

|     |       |    |     |       |        |      |      |      |      |      |      |       |     |      |       |       |   |
|-----|-------|----|-----|-------|--------|------|------|------|------|------|------|-------|-----|------|-------|-------|---|
| 31  | Leu7  | 45 | 5.0 | 134.7 | 673.5  | 11.9 | 34.6 | 46.5 | 17.7 | 64.2 | 35.8 | 116.0 | 1.1 | 6.6  | 159.0 | 249.0 | 0 |
| 36  | Leu8  | 34 | 3.0 | 116.9 | 350.7  | 15.9 | 31.8 | 47.7 | 12.7 | 60.4 | 39.6 | 94.2  | 1.6 | /    | /     | /     | 1 |
| 44  | Leu9  | 29 | 3.0 | 132.8 | 398.4  | 17.6 | 34.4 | 52.0 | 18.0 | 70.0 | 30.0 | 89.2  | 1.1 | 7.1  | 157.0 | 259.0 | 0 |
| 48  | Leu10 | 30 | 3.0 | 164.7 | 494.1  | 12.9 | 25.8 | 38.7 | 30.6 | 69.3 | 30.7 | 109.4 | 1.4 | 5.4  | 123.0 | 286.0 | 0 |
| 50  | Leu11 | 27 | 5.0 | 116.9 | 233.8  | 22.7 | 20.5 | 43.2 |      | 65.9 |      | 94.9  | 1.2 | 7.7  | 153.0 | 222.0 | 0 |
| 55  | Leu12 | 26 | 2.0 | 151.4 | 302.8  | 14.0 | 19.3 | 33.3 | 25.3 | 58.6 | 41.4 | 107.2 | 1.5 | 9.8  | 164.0 | 276.0 | 0 |
| 56  | Leu13 | 31 | 5.5 | 207.2 | 1139.6 | 14.1 | 20.5 | 34.6 | 21.4 | 56.0 | 44.0 | 100.9 | 1.8 | 4.7  | 136.0 | 288.0 | 1 |
| 80  | Leu14 | 35 | 5.5 | 177.1 | 974.1  | 14.0 | 23.0 | 37.0 | 18.5 | 55.5 | 44.5 | 85.6  | 3.9 | /    | /     | /     | 0 |
| 87  | Leu15 | 30 | 3.5 | 170.7 | 597.5  | 15.2 | 17.9 | 33.1 | 29.2 | 62.3 | 37.7 | 93.6  | 1.0 | 7.3  | 159.0 | 254.0 | 0 |
| 104 | Leu16 | 28 | 3.5 | 119.5 | 418.3  | 15.6 | 26.7 | 42.3 | 26.2 | 68.5 | 31.5 | 105.0 | 1.0 | 8.5  | 130.0 | 213.0 | 0 |
| 105 | Leu17 | 29 | 5.5 | 260.3 | 1431.7 | 11.2 | 22.4 | 33.6 | 17.3 | 50.9 | 49.1 | 96.6  | 1.3 | 6.0  | 129.0 | 215.0 | 0 |
| 106 | Leu18 | 28 | 5.0 | 164.7 | 823.5  | 12.3 | 29.7 | 42.0 | 14.8 | 56.8 | 43.2 | 98.0  | 1.3 | 8.2  | 167.0 | 217.0 | 0 |
| 109 | Leu19 | 30 | 3.0 | 193.9 | 581.7  | 15.1 | 26.0 | 41.1 | 17.8 | 58.9 | 41.1 | 100.3 | 2.3 | /    | /     | /     | 0 |
| 111 | Leu20 | 29 | 3.5 | 154.1 | 539.4  | 14.8 | 19.7 | 34.5 | 20.7 | 55.2 | 44.8 | 109.4 | 1.1 | 5.4  | 157.0 | 202.0 | 1 |
| 114 | Leu21 | 26 | 3.5 | 139.7 | 489.0  | 13.3 | 34.0 | 47.3 | 26.8 | 74.1 | 25.9 | 105.9 | 1.3 | 6.3  | 163.0 | 198.0 | 0 |
| 118 | Leu22 | 26 | 1.0 | 152.7 | 152.7  | 18.1 | 23.6 | 41.7 | 19.1 | 60.8 | 39.2 | 107.2 | 1.5 | 10.2 | 130.0 | 190.0 | 0 |
| 4   | Ast1  | 30 | 3.0 | 175.3 | 525.9  | 10.6 | 21.2 | 31.8 | 18.9 | 50.7 | 49.3 | 56.2  | 0.7 | 7.5  | 144.0 | 211.0 | 0 |
| 7   | Ast2  | 28 | 3.5 | 97.3  | 340.6  | 1.0  | 10.3 | 11.3 | 30.7 | 42.0 | 78.0 | 46.3  | 0.8 | 7.2  | 153.0 | 230.0 | 0 |
| 14  | Ast3  | 29 | 3.0 | 95.0  | 285.0  | 11.1 | 17.0 | 28.1 | 11.0 | 39.1 | 60.9 | 81.6  | 0.7 | 6.9  | 132.0 | 199.0 | 1 |
| 15  | Ast4  | 31 | 4.0 | 85.0  | 340.0  | 4.5  | 12.9 | 17.4 | 17.0 | 34.4 | 65.6 | 55.9  | 0.7 | 8.4  | 168.0 | 255.0 | 1 |
| 20  | Ast5  | 29 | 6.0 | 82.4  | 494.4  | 11.1 | 14.7 | 25.8 | 15.1 | 40.9 | 59.1 | 62.2  | 0.7 | 7.3  | 128.0 | 188.0 | 0 |
| 24  | Ast6  | 31 | 5.0 | 53.1  | 265.5  | 10.0 | 14.1 | 24.1 | 21.8 | 45.9 | 54.1 | 90.1  | 0.8 | 6.7  | 156.0 | 281.0 | 0 |
| 49  | Ast7  | 36 | 4.0 | 61.9  | 247.6  | 2.6  | 11.8 | 14.4 | 10.5 | 24.9 | 75.1 | 48.1  | 0.7 | 4.8  | 160.0 | 257.0 | 0 |
| 78  | Ast8  | 29 | 3.5 | 74.4  | 260.4  | 7.1  | 17.9 | 25.0 | 20.5 | 45.5 | 54.5 | 60.4  | 0.7 | 5.5  | 155.0 | 222.0 | 0 |
| 84  | Ast9  | 32 | 1.5 | 164.7 | 247.1  | 11.1 | 18.1 | 29.2 | 21.0 | 50.2 | 49.8 | 79.3  | 0.8 | /    | /     | /     | 1 |
| 91  | Ast10 | 35 | 5.0 | 148.8 | 744.0  | 5.7  | 21.7 | 27.4 | 19.0 | 46.4 | 53.6 | 66.0  | 0.7 | 6.5  | 158.0 | 223.0 | 0 |
| 108 | Ast11 | 34 | 4.0 | 85.0  | 340.0  | 12.5 | 18.8 | 31.3 | 14.3 | 45.6 | 54.4 | 77.2  | 0.5 | 7.5  | 149.0 | 209.0 | 0 |
| 110 | Ast12 | 28 | 4.0 | 111.6 | 446.4  | 10.3 | 20.7 | 31.0 | 17.5 | 48.5 | 51.5 | 92.7  | 0.9 | 5.6  | 135.0 | 198.0 | 0 |
| 115 | Ast13 | 33 | 3.0 | 103.6 | 310.8  | 7.7  | 17.9 | 25.6 | 23.1 | 48.7 | 51.3 | 75.2  | 0.6 | 8.0  | 155.0 | 209.0 | 1 |
| 6   | LA1   | 40 | 5.5 | 111.6 | 613.8  | 4.8  | 14.3 | 19.1 | 9.5  | 28.6 | 71.4 | 41.9  | 1.3 | 8.5  | 166.0 | 295.0 | 0 |
| 10  | LA2   | 34 | 2.0 | 93.0  | 186.0  | 5.7  | 11.4 | 17.1 | 23.8 | 40.9 | 59.1 | 32.0  | 1.2 | 9.6  | 158.0 | 215.0 | 0 |
| 12  | LA3   | 30 | 3.5 | 69.1  | 241.9  | 3.5  | 8.2  | 11.7 | 15.0 | 26.7 | 73.3 | 55.0  | 1.6 | 5.0  | 151.0 | 256.0 | 0 |
| 19  | LA4   | 33 | 1.5 | 97.2  | 145.8  | 2.5  | 12.2 | 14.7 | 13.0 | 27.7 | 72.3 | 40.9  | 1.6 | 8.9  | 165.0 | 216.0 | 0 |

|     |      |    |     |       |       |      |      |      |      |      |      |      |     |      |       |       |   |
|-----|------|----|-----|-------|-------|------|------|------|------|------|------|------|-----|------|-------|-------|---|
| 21  | LA5  | 37 | 4.5 | 98.3  | 442.4 | 10.2 | 22.0 | 32.2 | 18.8 | 51.0 | 49.0 | 95.6 | 1.1 | 6.7  | 148.0 | 218.0 | 1 |
| 22  | LA6  | 38 | 5.0 | 55.8  | 279.0 | 12.3 | 17.7 | 30.0 | 15.2 | 45.2 | 54.8 | 59.3 | 1.8 | 7.0  | 161.0 | 237.0 | 1 |
| 26  | LA7  | 29 | 3.5 | 45.2  | 158.2 | 3.5  | 9.7  | 13.2 | 11.1 | 24.3 | 75.7 | 48.1 | 2.6 | 6.8  | 155.0 | 214.0 | 0 |
| 27  | LA8  | 39 | 3.5 | 39.8  | 139.3 | 4.8  | 15.2 | 20.0 | 10.7 | 30.7 | 73.3 | 45.7 | 1.4 | 5.7  | 168.0 | 213.0 | 0 |
| 28  | LA9  | 40 | 5.0 | 71.7  | 358.5 | 14.0 | 16.5 | 30.5 | 10.3 | 40.8 | 59.2 | 42.5 | 1.5 | 6.8  | 161.0 | 221.0 | 0 |
| 32  | LA10 | 26 | 3.0 | 75.9  | 227.7 | 5.4  | 7.0  | 12.4 | 14.1 | 26.5 | 88.5 | 33.5 | 2.7 | 5.2  | 162.0 | 265.0 | 1 |
| 35  | LA11 | 39 | 4.0 | 147.4 | 589.6 | 10.8 | 16.2 | 27.0 | 34.2 | 61.2 | 38.8 | 96.5 | 1.4 | 5.3  | 158.0 | 210.0 | 1 |
| 38  | LA12 | 32 | 4.5 | 21.3  | 95.9  | 3.0  | 9.5  | 12.5 | 11.0 | 23.5 | 76.5 | 34.8 | 3.7 | 5.1  | 159.0 | 233.0 | 0 |
| 42  | LA13 | 27 | 4.0 | 132.8 | 531.2 | 4.7  | 12.3 | 17.0 | 21.0 | 38.0 | 62.0 | 45.7 | 3.1 | 6.1  | 139.0 | 265.0 | 1 |
| 51  | LA14 | 32 | 3.5 | 55.8  | 195.3 | 4.8  | 14.3 | 19.1 | 16.7 | 35.8 | 64.2 | 59.2 | 1.8 | 5.9  | 135.0 | 195.0 | 0 |
| 54  | LA15 | 21 | 1.5 | 71.3  | 107.0 | 4.4  | 10.9 | 15.3 | 15.2 | 30.5 | 93.5 | 36.0 | 2.0 | /    | /     | /     | / |
| 59  | LA16 | 34 | 5.0 | 74.5  | 372.5 | 4.0  | 13.8 | 17.8 | 13.0 | 30.8 | 69.2 | 70.3 | 1.5 | 12.7 | 160.0 | 169.0 | 0 |
| 64  | LA17 | 32 | 4.0 | 74.4  | 297.6 | 3.6  | 14.3 | 17.9 | 22.6 | 40.5 | 59.5 | 46.7 | 1.3 | 5.9  | 145.0 | 170.0 | 0 |
| 74  | LA18 | 32 | 4.0 | 45.2  | 180.8 | 5.9  | 11.8 | 17.7 | 17.6 | 35.3 | 64.7 | 41.9 | 2.1 | 6.9  | 140.0 | 213.0 | 1 |
| 77  | LA19 | 31 | 3.0 | 75.4  | 226.2 | 3.6  | 14.3 | 17.9 | 12.5 | 30.4 | 69.6 | 39.8 | 2.3 | 7.0  | 158.0 | 231.0 | 0 |
| 82  | LA20 | 26 | 3.0 | 73.8  | 221.4 | 8.4  | 21.1 | 29.5 | 13.6 | 43.1 | 56.9 | 68.4 | 1.2 | 5.6  | 152.0 | 231.0 | 0 |
| 85  | LA21 | 34 | 2.5 | 69.9  | 174.8 | 4.5  | 6.9  | 11.4 | 13.8 | 25.2 | 94.8 | 60.2 | 1.4 | 9.7  | 162.0 | 167.0 | 1 |
| 86  | LA22 | 27 | 4.5 | 50.5  | 227.3 | 5.3  | 14.8 | 20.1 | 20.6 | 40.7 | 59.3 | 59.4 | 1.1 | /    | /     | /     | 1 |
| 88  | LA23 | 39 | 3.5 | 67.1  | 234.9 | 3.6  | 10.0 | 13.6 | 20.8 | 34.4 | 65.6 | 45.7 | 1.4 | 5.7  | 121.0 | 213.0 | 0 |
| 89  | LA24 | 30 | 6.5 | 63.8  | 414.7 | 10.5 | 18.7 | 29.2 | 16.7 | 45.9 | 54.1 | 62.9 | 3.4 | /    | /     | /     | 0 |
| 92  | LA25 | 29 | 2.5 | 69.1  | 172.8 | 7.7  | 14.5 | 22.2 | 17.8 | 40.0 | 60.0 | 56.2 | 1.2 | 6.7  | 145.0 | 202.0 | 0 |
| 96  | LA26 | 41 | 5.5 | 98.3  | 540.7 | 10.8 | 12.2 | 23.0 | 17.6 | 40.6 | 59.4 | 64.0 | 2.7 | /    | /     | /     | 0 |
| 99  | LA27 | 41 | 3.0 | 103.6 | 207.2 | 6.8  | 15.0 | 21.8 | 18.6 | 40.4 | 49.6 | 68.8 | 1.4 | /    | /     | /     | 0 |
| 102 | LA28 | 26 | 3.5 | 129.2 | 452.2 | 5.7  | 12.9 | 18.6 | 12.0 | 30.6 | 69.4 | 63.5 | 2.7 | 5.2  | 119.0 | 265.0 | 0 |
| 107 | LA29 | 28 | 6.0 | 77.1  | 462.6 | 16.1 | 15.1 | 31.2 | 23.6 | 54.8 | 45.2 | 88.0 | 1.1 | /    | /     | /     | 0 |
| 113 | LA30 | 31 | 4.5 | 74.4  | 334.8 | 4.9  | 12.9 | 17.8 | 30.9 | 48.7 | 51.3 | 42.1 | 2.8 | 6.1  | 150.0 | 189.0 | 0 |
| 116 | LA31 | 31 | 3.0 | 79.7  | 239.1 | 6.7  | 15.7 | 22.4 | 21.0 | 43.4 | 56.6 | 69.4 | 1.8 | 5.5  | 153.0 | 201.0 | 0 |
| 117 | LA32 | 28 | 2.5 | 97.6  | 244.0 | 8.5  | 12.9 | 21.4 | 12.3 | 33.7 | 96.3 | 53.1 | 1.5 | 6.3  | 145.0 | 198.0 | 0 |
