# Supplementary material for: Semen microbiota in normal and leukocytospermic males
Source: PubMed Central journal article supplement — Asian J Androl. 2021 Dec 10;24(4):398–405. doi: 10.4103/aja202172 (PMC9295480; doi:10.4103/aja202172), 2021-12-10
Supplement: AJA-24-398_Suppl3.pdf [file AJA-24-398_Suppl3.pdf]

**Supplementary Table 4 attached in this file!**
